# Supplementary material for: Magnetic nanoparticle-supported ferrocenylphosphine: a reusable catalyst for hydroformylation of alkene and Mizoroki–Heck olefination
Source: Royal Society of Chemistry journal article supplement (doi:10.1039/c6ra03859j), 2016-01-01
Supplement: c6ra03859j1.pdf [file c6ra03859j1.pdf]

*Supporting Information*

**Magnetic Nanoparticle-Supported Ferrocenylphosphine: A Reusable Catalyst for Hydroformylation of Alkene and Mizoroki-Heck Olefination**

M. Nasiruzzaman Shaikh,<sup>\*,a</sup> Md. Abdul Aziz,<sup>a</sup> Aasif Helal,<sup>a</sup> Mohamed Bououdina,<sup>b</sup> Zain H. Yamani<sup>a</sup> and Tae-Jeong Kim<sup>c</sup>

**Contents**

| Entry | Data                                                                                                                                                 | Page # |
|-------|------------------------------------------------------------------------------------------------------------------------------------------------------|--------|
| 1     | Synthetic route: Scheme of <b>dop-BPPF</b>                                                                                                           | 2      |
| 2     | <sup>1</sup> H- NMR Spectrum of <b>dop-BPPF</b>                                                                                                      | 3      |
| 3     | <sup>31</sup> P NMR Spectrum of <b>dop-BPPF</b>                                                                                                      | 4      |
| 4     | FAB-Mass Spectrum of <b>dop-BPPF</b>                                                                                                                 | 5      |
| 5     | TGA Curve                                                                                                                                            | 6      |
| 6     | FTIR spectra                                                                                                                                         | 7      |
| 7     | Table 1: for Structural, microstructural of magnetite Fe <sub>3</sub> O <sub>4</sub> before and after coating and complexation with Pd and Rh.       | 8      |
| 8     | Table 2. Magnetic properties investigation data of magnetite Fe <sub>3</sub> O <sub>4</sub> before and after coating and complexation with Pd and Rh | 8      |
| 9     | XRD pattern refinement using the Rietveld method of Fe <sub>3</sub> O <sub>4</sub>                                                                   | 9      |
| 10    | XRD pattern refinement using the Rietveld method of <b>Fe<sub>3</sub>O<sub>4</sub>@dop-BPPF</b>                                                      | 10     |
| 11    | XRD pattern refinement using the Rietveld method of <b>Fe<sub>3</sub>O<sub>4</sub>@dop-BPPF-Pd</b>                                                   | 11     |
| 12    | XRD pattern refinement using the Rietveld method of <b>Fe<sub>3</sub>O<sub>4</sub>@dop-BPPF-Rh</b>                                                   | 12     |
| 13    | EDX spectra of (a) <b>Fe<sub>3</sub>O<sub>4</sub>@dop-BPPF-Rh</b> and (b) <b>Fe<sub>3</sub>O<sub>4</sub>@dop-BPPF-Pd</b>                             | 13     |
| 14    | GC and Mass spectra                                                                                                                                  | 14-37  |

### Scheme 1

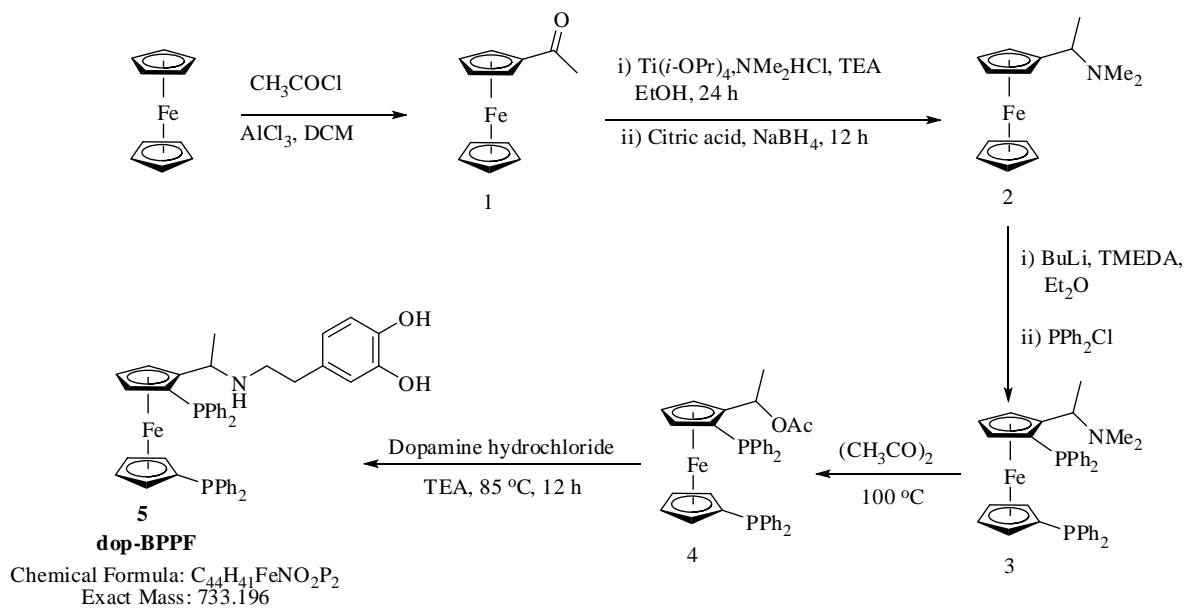

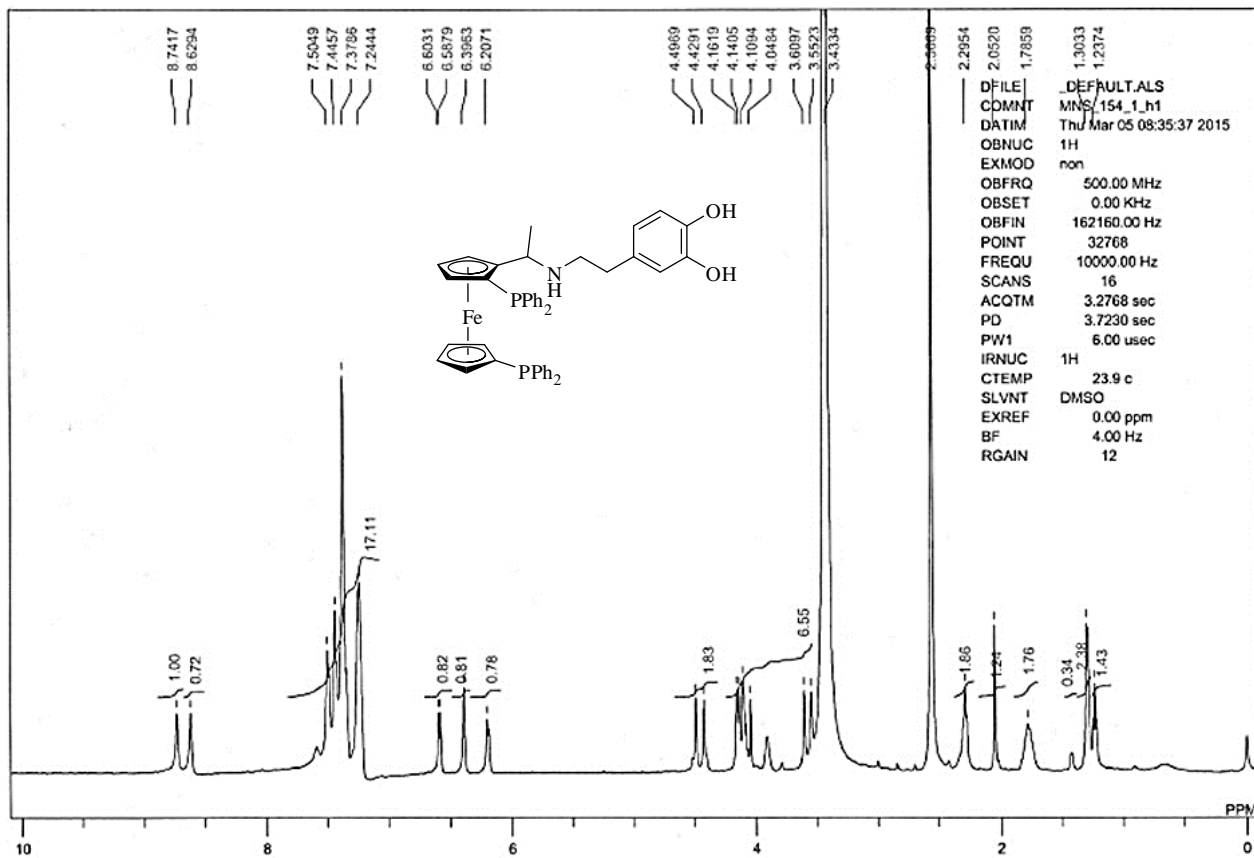

S1:  $^1\text{H}$  NMR of the **dop-BPPF** in  $\text{DMSO-}d_6$

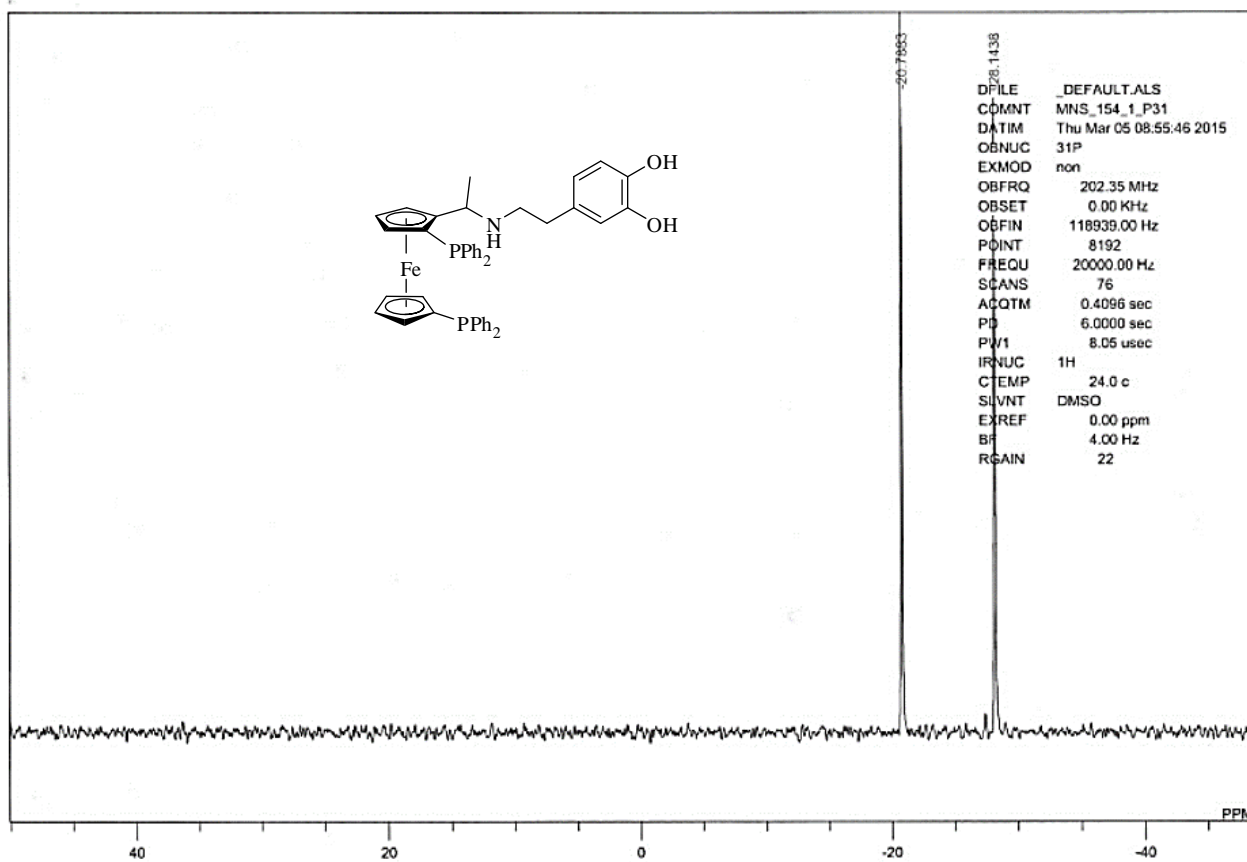

S2:  $^{31}\text{P}$  NMR of the **dop-BPPF** in  $\text{DMSO-}d_6$

[ Mass Spectrum ]  
 Data : MNS-154-C44H41FeNO2P2 Date : 20-May-2015 21:56  
 Sample : -  
 Note : -  
 Inlet : Direct Ion Mode : FAB+  
 Spectrum Type : Normal Ion [EF-Linear]  
 RT : 0.68 min Scan# : (14,15)  
 BP : m/z 733.1961 Int. : 19.77  
 Output m/z range : 675.0000 to 799.0000 Cut Level : 0.00 %

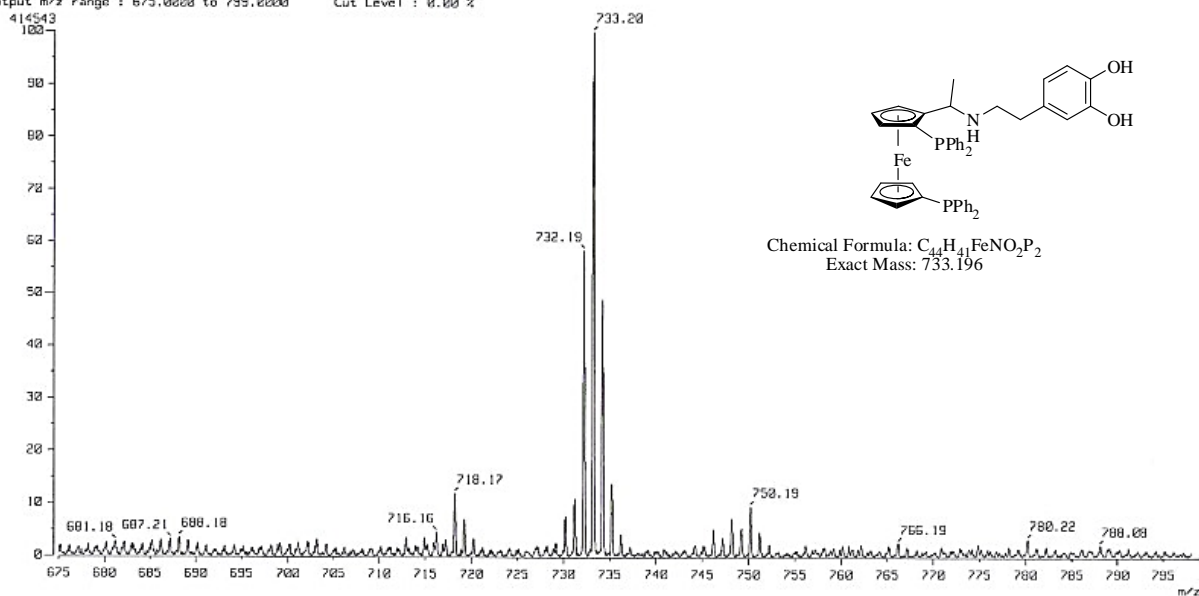

S3: FAB-Mass spectrum of the **dop-BPPF**

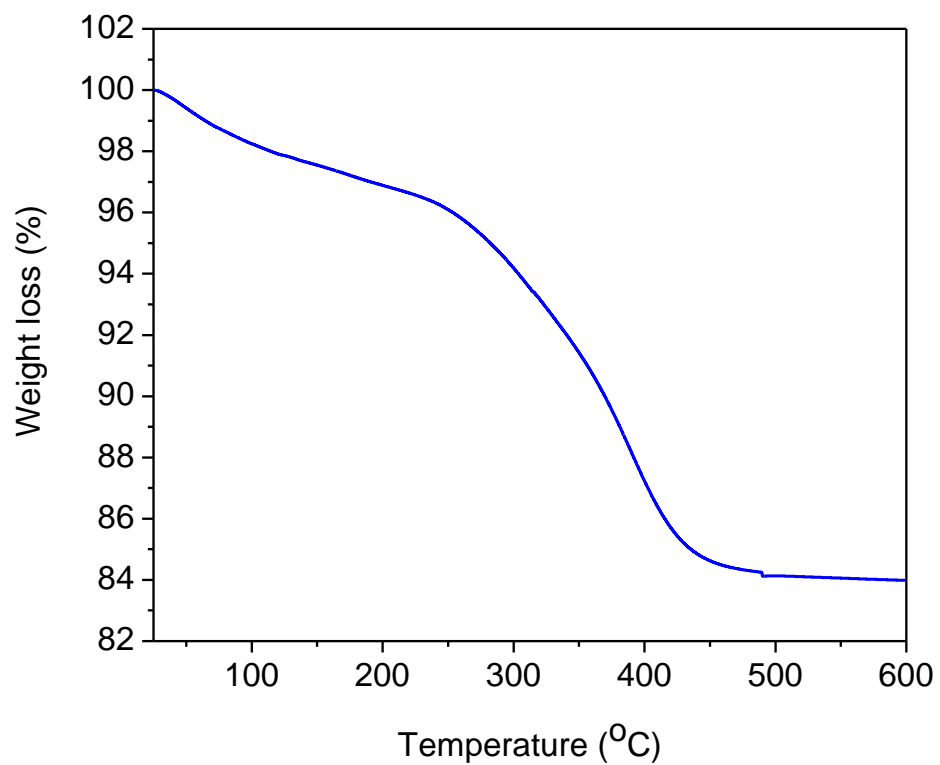

S4: TGA of **Fe<sub>3</sub>O<sub>4</sub>@dop-BPPF** under argon atmosphere

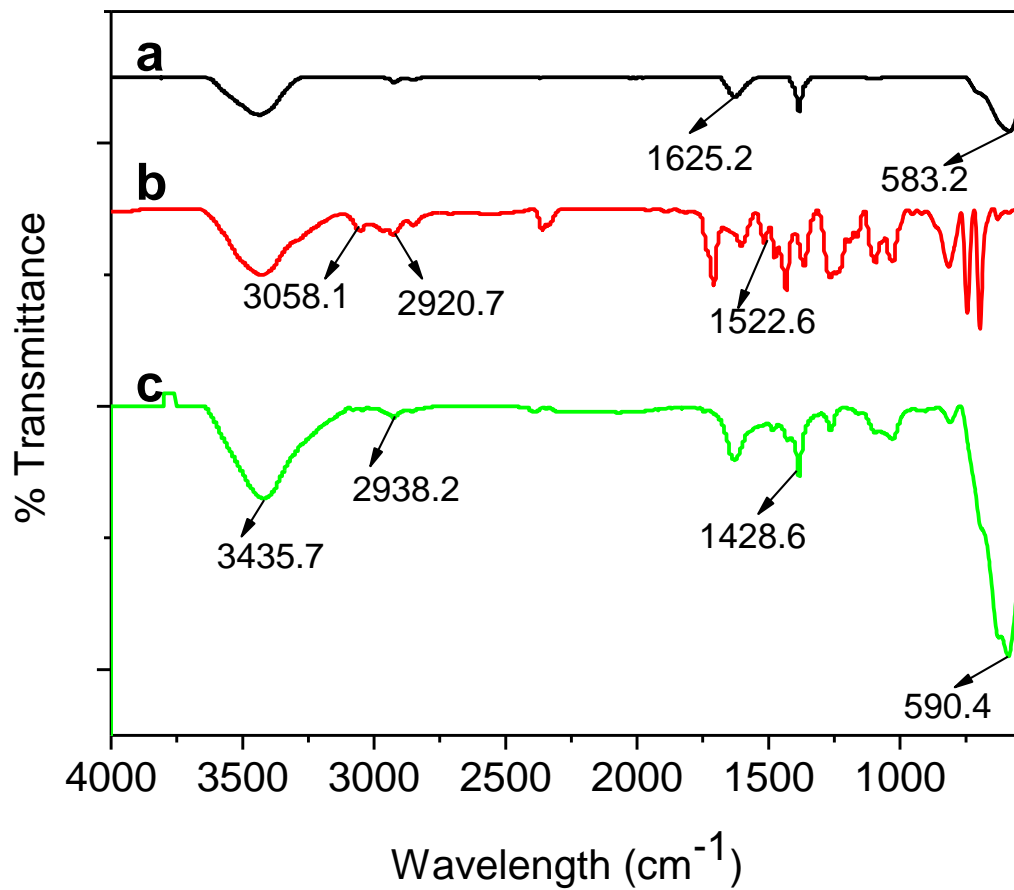

S5: FT-IR spectrum of a) Fe<sub>3</sub>O<sub>4</sub> b) dop-BPPF c) Fe<sub>3</sub>O<sub>4</sub>@dop-BPPF with KBr pallet

Table 1. Structural, microstructural of magnetite Fe<sub>3</sub>O<sub>4</sub> before and after coating and complexation with Pd and Rh.

|                                                | Crystallite size (nm) | Microstrain (%) | Lattice parameter (Å) | Goodness of fit |
|------------------------------------------------|-----------------------|-----------------|-----------------------|-----------------|
| Fe <sub>3</sub> O <sub>4</sub>                 | 8.4                   | 0.360           | 8.372(4)              | 1.0726          |
| <b>Fe<sub>3</sub>O<sub>4</sub>@dop-BPPF</b>    | 8.5                   | 0.478           | 8.365(4)              | 1.1276          |
| <b>Fe<sub>3</sub>O<sub>4</sub>@dop-BPPF-Pd</b> | 8.6                   | 0.500           | 8.363(4)              | 1.1079          |
| <b>Fe<sub>3</sub>O<sub>4</sub>@dop-BPPF-Rh</b> | 8.4                   | 0.340           | 8.359(4)              | 1.1300          |

Table 2. Magnetic properties investigation data of magnetite Fe<sub>3</sub>O<sub>4</sub> before and after coating and complexation with Pd and Rh.

|                                                | Coercivity, $H_c$ (Oe) | Remanence, $M_r$ (emu/g) | Saturation magnetization, $M_s$ (emu/g) |
|------------------------------------------------|------------------------|--------------------------|-----------------------------------------|
| Fe <sub>3</sub> O <sub>4</sub>                 | 3.965                  | 0.802                    | 68.03                                   |
| <b>Fe<sub>3</sub>O<sub>4</sub>@dop-BPPF</b>    | 4.322                  | 0.645                    | 58.75                                   |
| <b>Fe<sub>3</sub>O<sub>4</sub>@dop-BPPF-Rh</b> | 4.480                  | 0.708                    | 56.00                                   |
| <b>Fe<sub>3</sub>O<sub>4</sub>@dop-BPPF-Pd</b> | 4.614                  | 0.722                    | 54.15                                   |



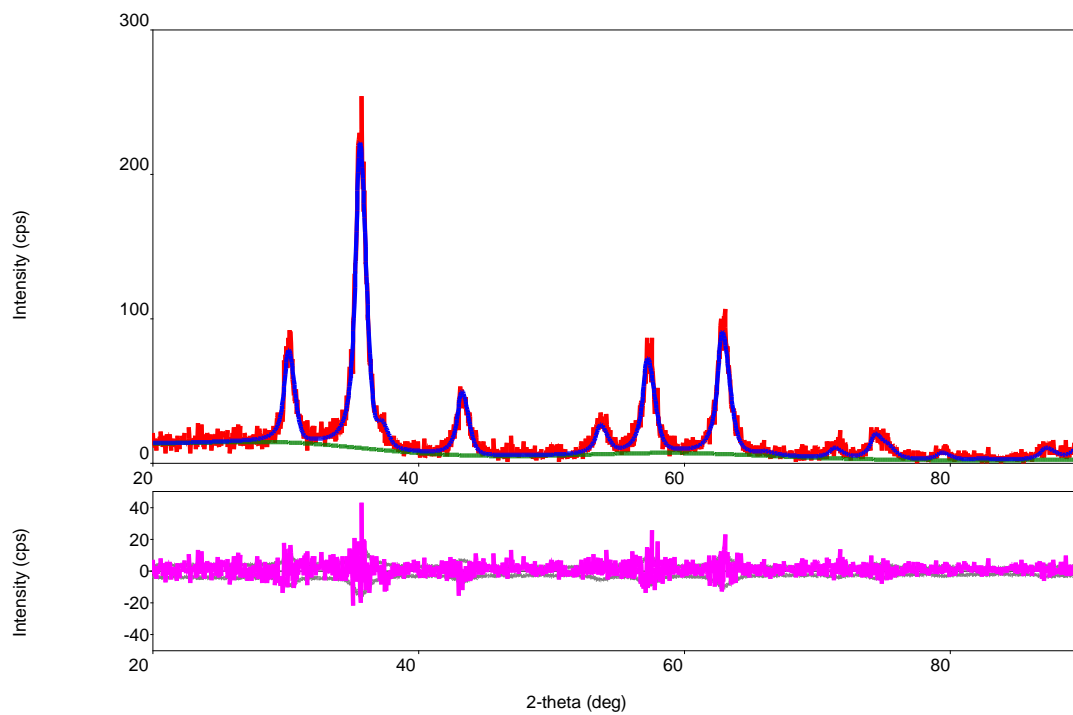

S6. XRD pattern refinement using the Rietveld method of Fe<sub>3</sub>O<sub>4</sub>

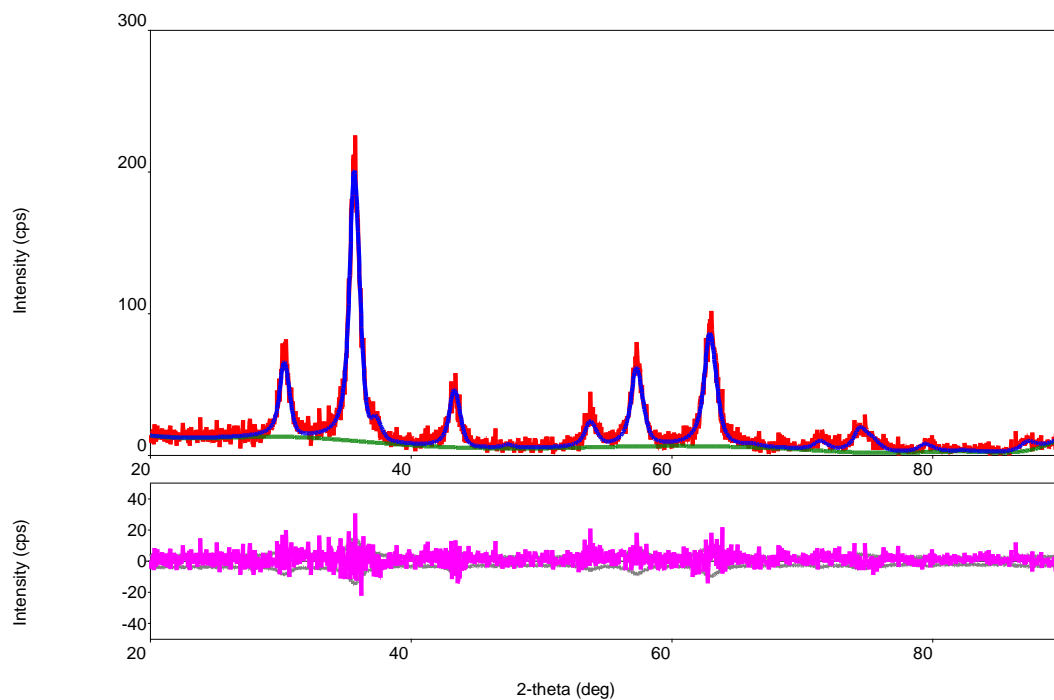

S7. XRD pattern refinement using the Rietveld method of  $\text{Fe}_3\text{O}_4$ @dop-BPPF

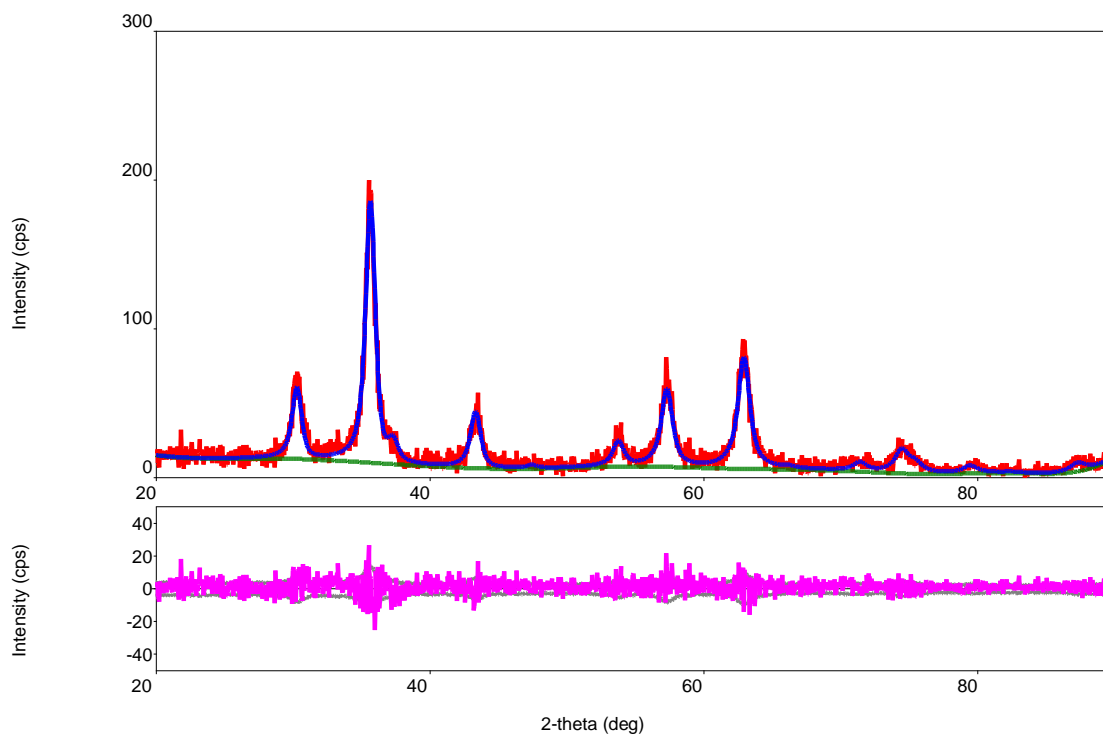

S8. XRD pattern refinement using the Rietveld method of  $\text{Fe}_3\text{O}_4$ @dop-BPPF-Pd

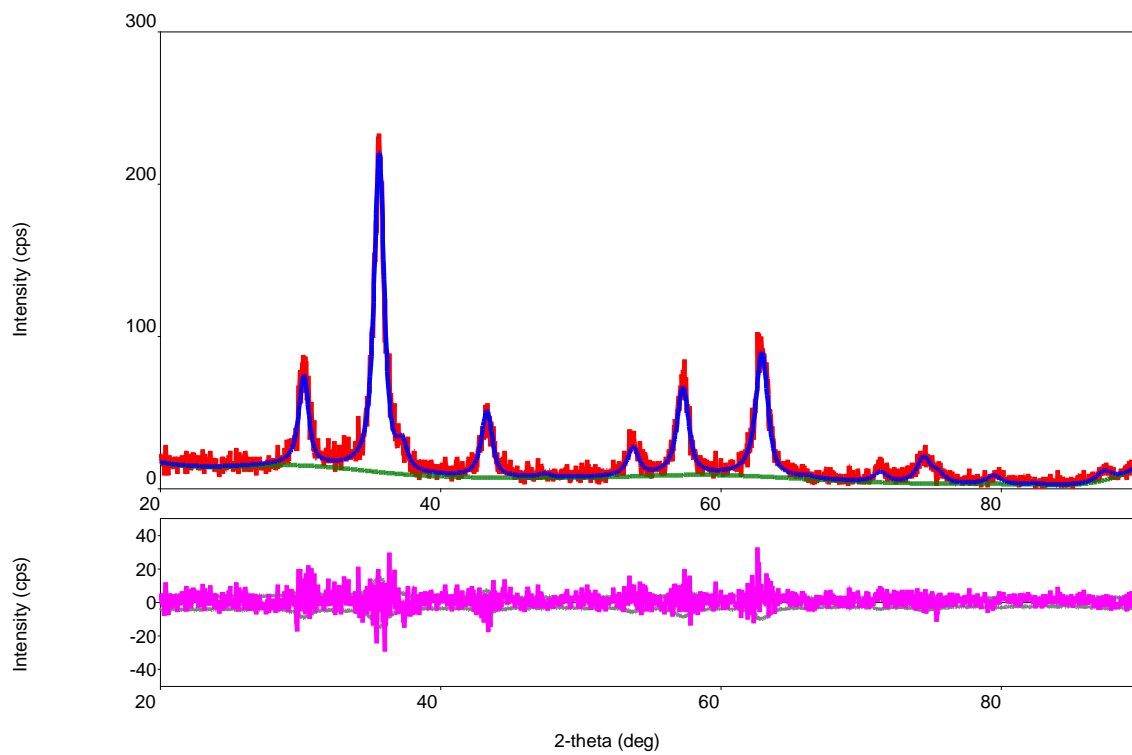

S9. XRD pattern refinement using the Rietveld method of  $\text{Fe}_3\text{O}_4$ @dop-BPPF-Rh

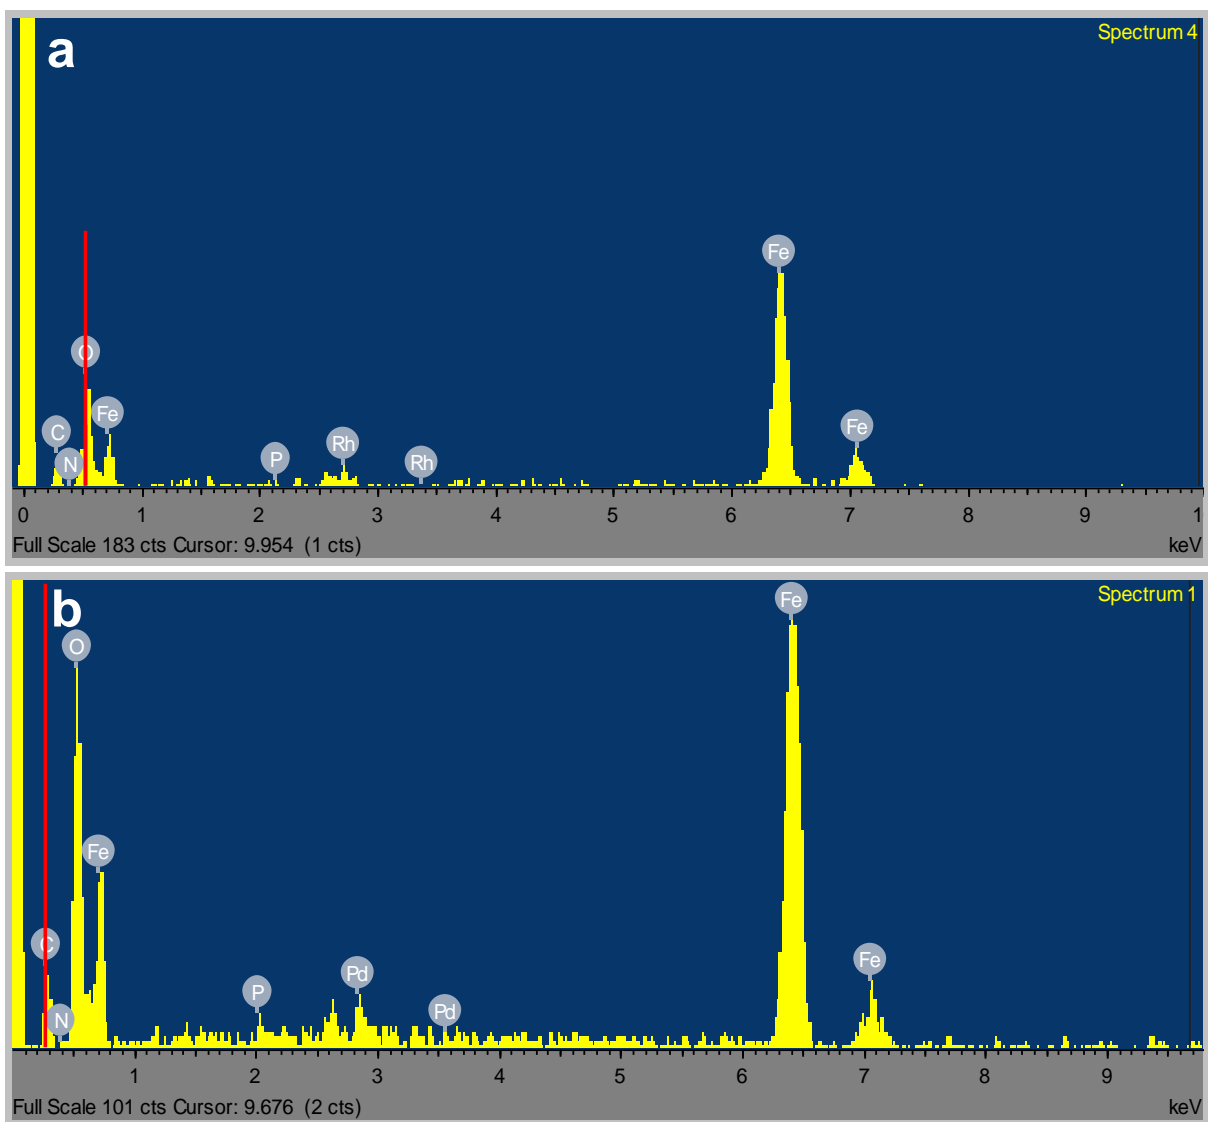

S10: EDX spectra of (a)  $\text{Fe}_3\text{O}_4@\text{dop-BPPF-Rh}$  and (b)  $\text{Fe}_3\text{O}_4@\text{dop-BPPF-Pd}$

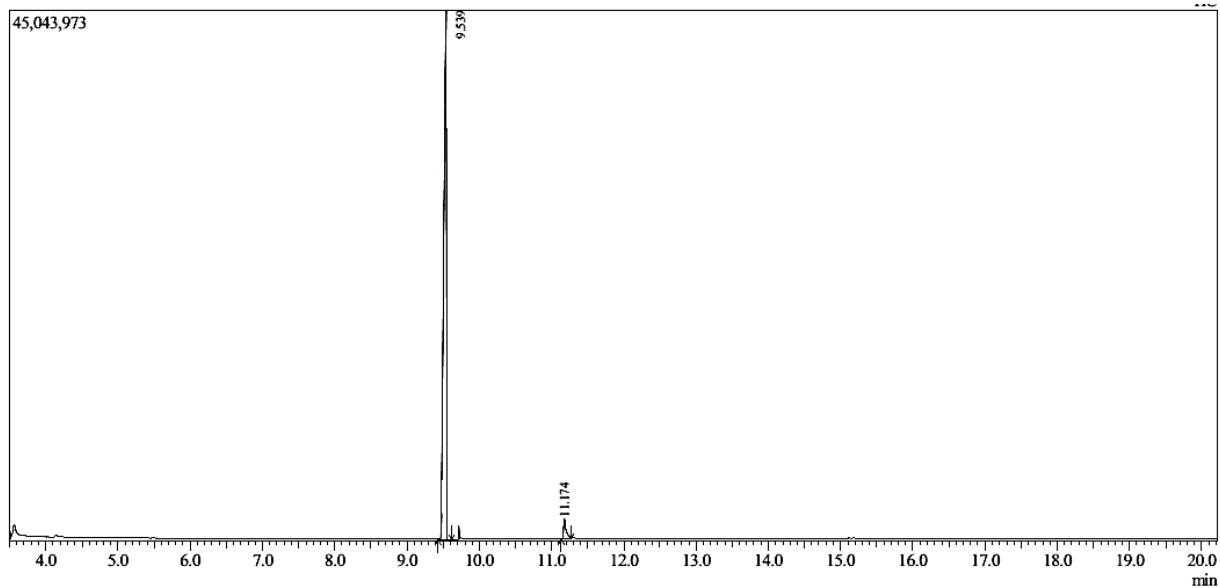

| Peak Report TIC |        |        |        |           |        |          |         |      |      |      |
|-----------------|--------|--------|--------|-----------|--------|----------|---------|------|------|------|
| Peak#           | R.Time | I.Time | F.Time | Area      | Area%  | Height   | Height% | A/H  | Mark | Name |
| 1               | 9.539  | 9.430  | 9.615  | 118818367 | 96.38  | 45026016 | 96.32   | 2.64 | MI   |      |
| 2               | 11.174 | 11.135 | 11.265 | 4468029   | 3.62   | 1720370  | 3.68    | 2.60 | MI   |      |
|                 |        |        |        | 123286396 | 100.00 | 46746386 | 100.00  |      |      |      |

S11: GC spectra of hydroformylated product of styrene in DCM at 45 °C

Line#:1 R.Time:9.515(Scan#:1204)  
 MassPeaks:566  
 RawMode:Single 9.515(1204) BasePeak:105(8002990)  
 BG Mode:None Group 1 - Event 1

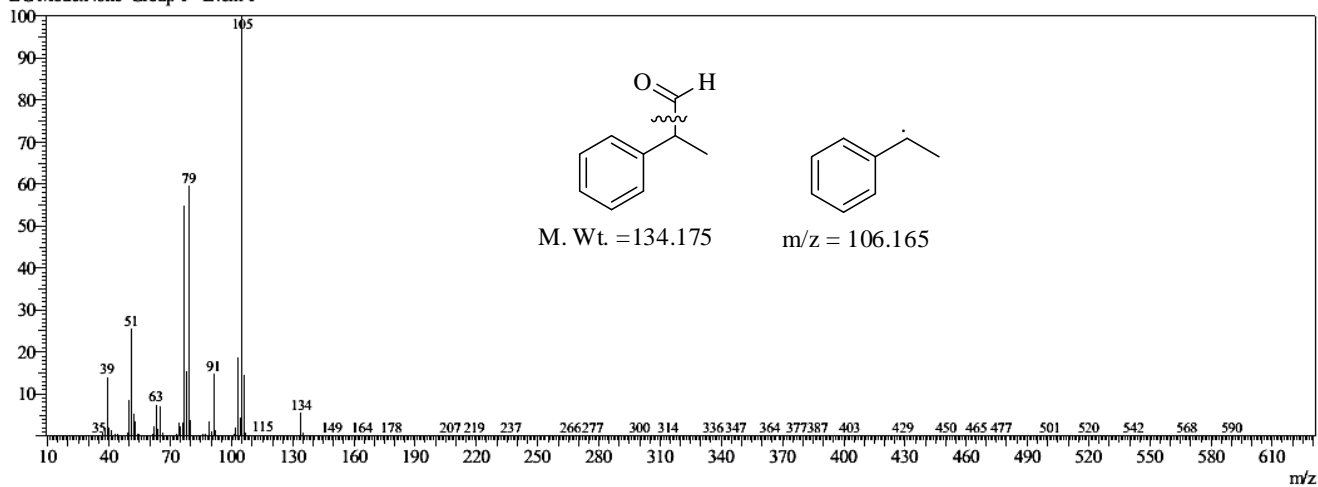

S12: Mass spectra of hydroformylated branched product of styrene

Line#:2 R.Time:11.200(Scan#:1541)  
MassPeaks:563  
RawMode:Single 11.200(1541) BasePeak:91(104470)  
BG Mode:None Group 1 - Event 1

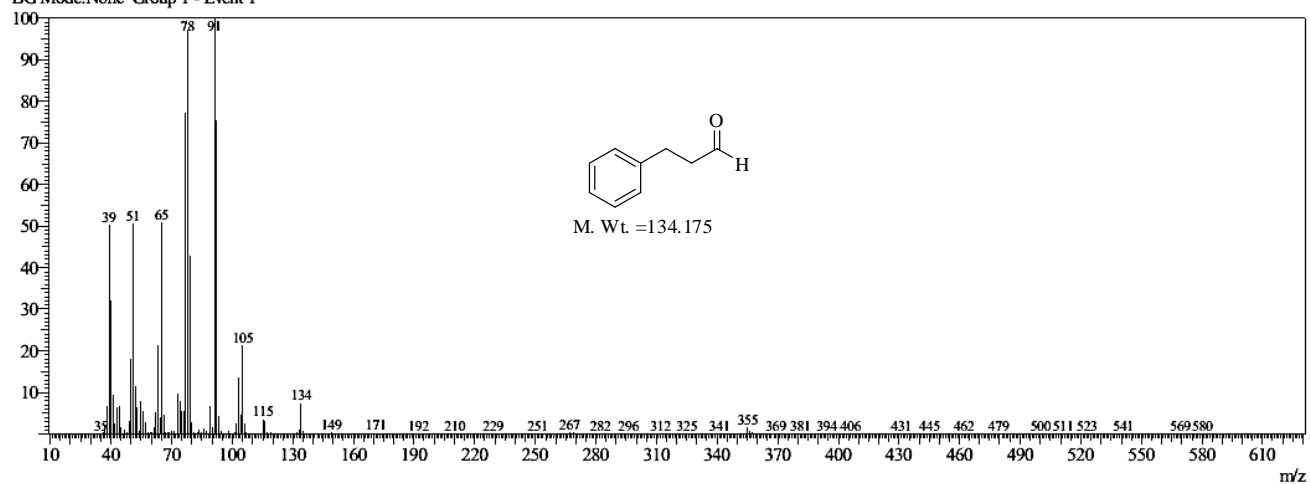

S13: Mass spectra of hydroformylated linear product of styrene

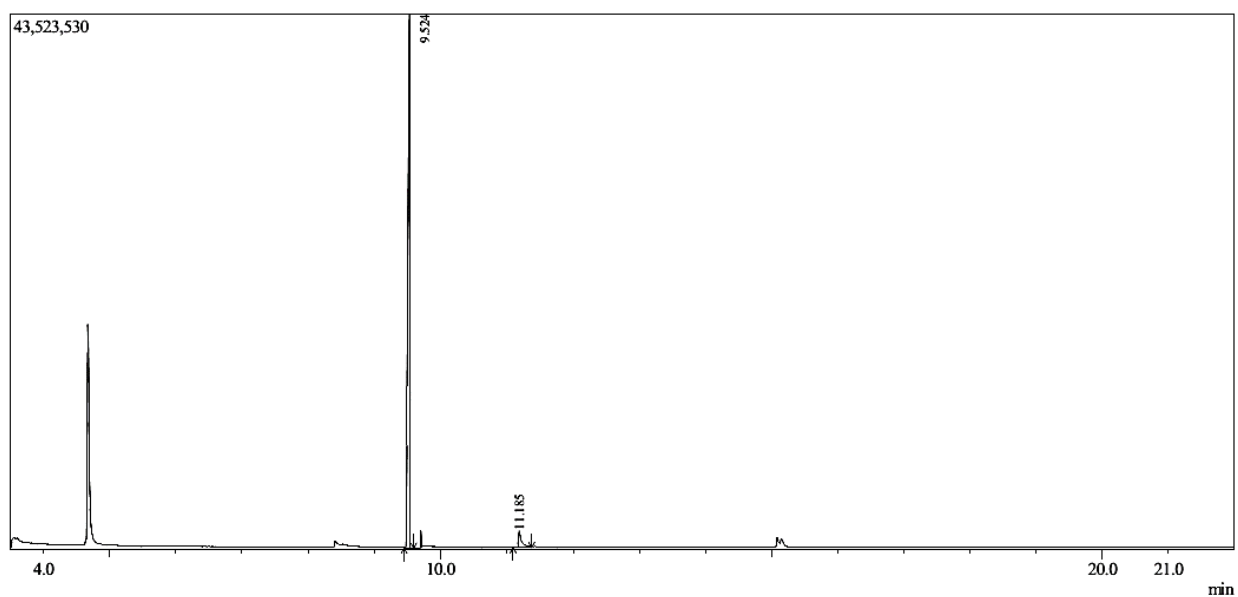

| Peak Report TIC |        |        |        |          |        |          |         |      |      |      |
|-----------------|--------|--------|--------|----------|--------|----------|---------|------|------|------|
| Peak#           | R.Time | I.Time | F.Time | Area     | Area%  | Height   | Height% | A/H  | Mark | Name |
| 1               | 9.524  | 9.445  | 9.590  | 78577219 | 94.52  | 43507808 | 97.01   | 1.81 | MI   |      |
| 2               | 11.185 | 11.095 | 11.370 | 4552580  | 5.48   | 1339183  | 2.99    | 3.40 | MI   |      |
|                 |        |        |        | 83129799 | 100.00 | 44846991 | 100.00  |      |      |      |

S14: GC spectra of hydroformylated product of styrene in THF at 45 °C



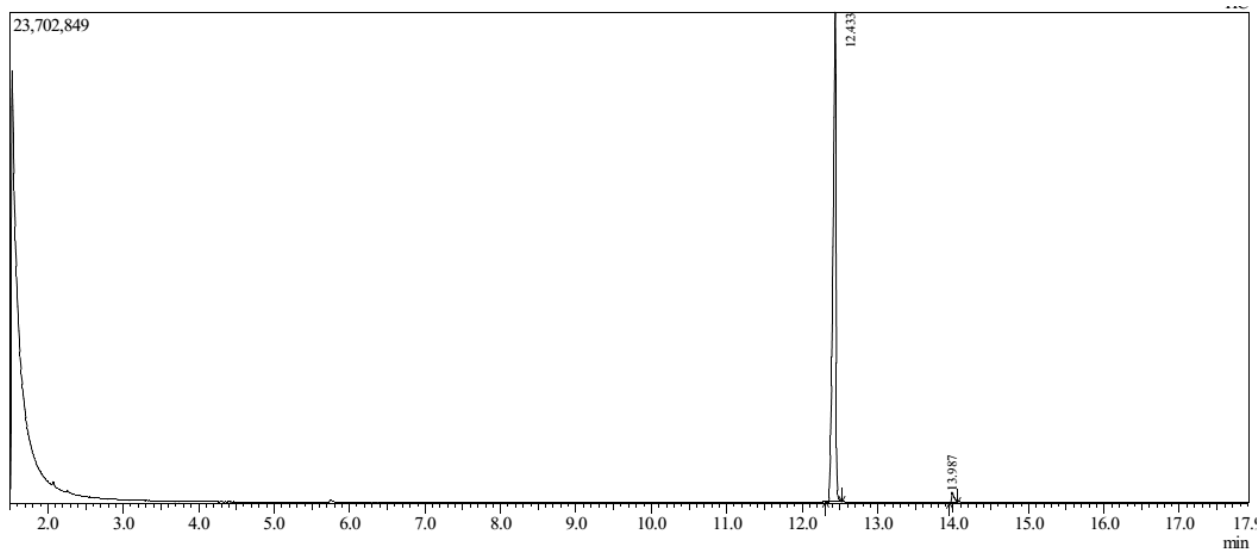

| Peak Report TIC |        |        |        |          |        |          |         |      |      |      |
|-----------------|--------|--------|--------|----------|--------|----------|---------|------|------|------|
| Peak#           | R.Time | I.Time | F.Time | Area     | Area%  | Height   | Height% | A/H  | Mark | Name |
| 1               | 12.433 | 12.305 | 12.525 | 65543599 | 98.13  | 23603131 | 97.86   | 2.78 | MI   |      |
| 2               | 13.987 | 13.955 | 14.055 | 1250366  | 1.87   | 517381   | 2.14    | 2.42 | MI   |      |
|                 |        |        |        | 66793965 | 100.00 | 24120512 | 100.00  |      |      |      |

S15: GC spectra of hydroformylated product of 4-methylstyrene in DCM at 45 °C

Line#:1 R.Time:12.435(Scan#:1788)

MassPeaks:560

RawMode:Single 12.435(1788) BasePeak:119(5337148)

BG Mode:None Group 1 - Event 1

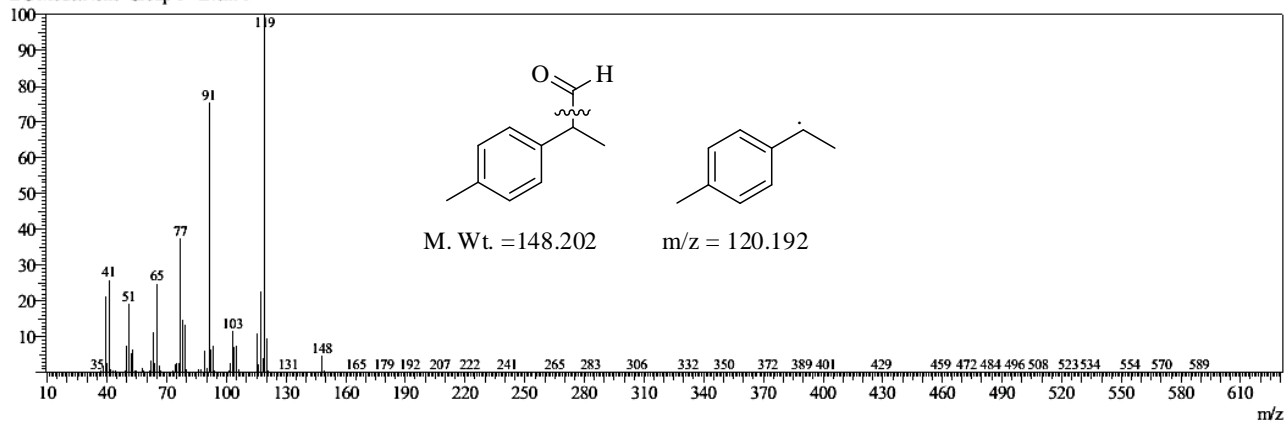

S16: Mass spectra of hydroformylated branched product of 4-methylstyrene

Line#:2 R.Time:14.015(Scan#:2104)  
 MassPeaks:564  
 RawMode:Single 14.015(2104) BasePeak:91(39290)  
 BG Mode:None Group 1 - Event 1

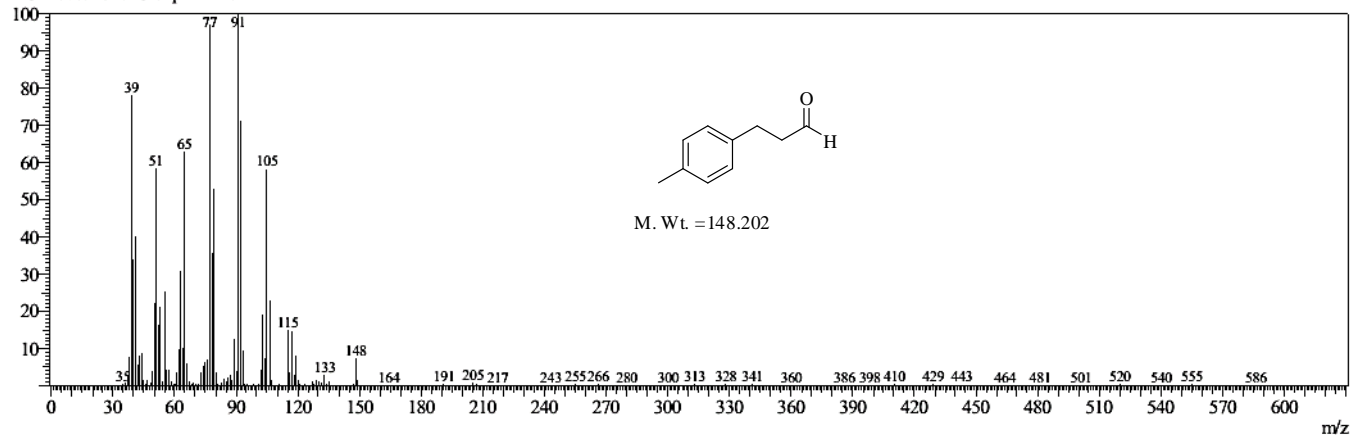

S17: Mass spectra of hydroformylated linear product of 4-methylstyrene

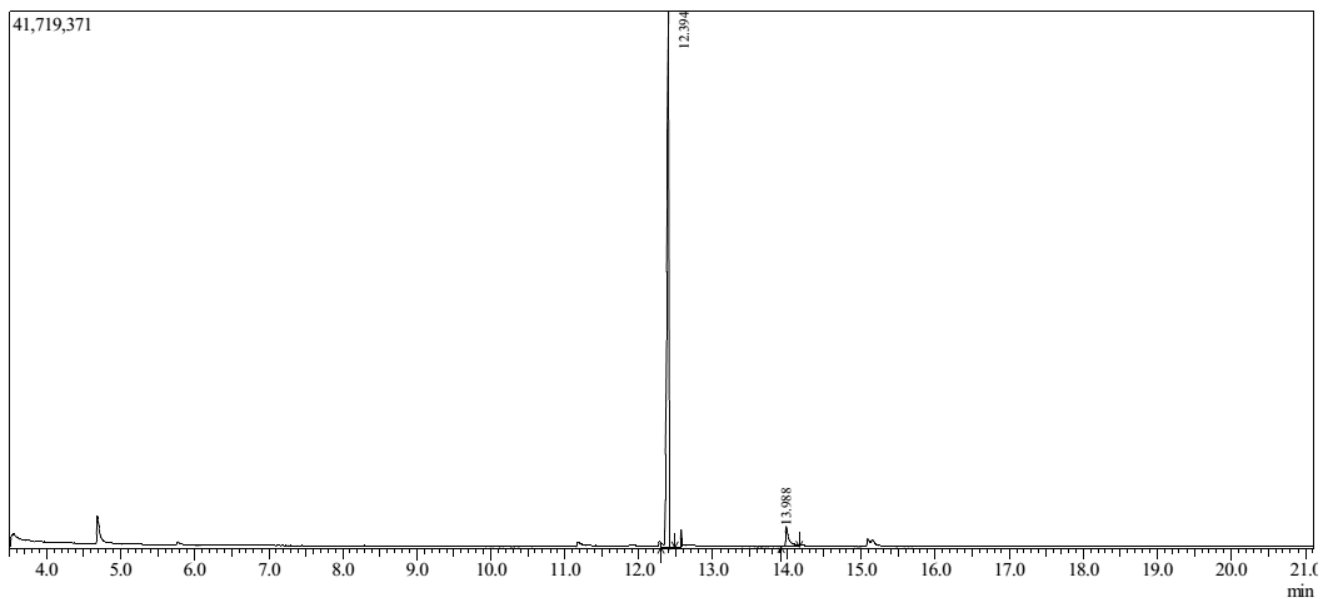

| Peak# | R.Time | I.Time | F.Time | Peak Report TIC |        |          |         | A/H  | Mark | Name |
|-------|--------|--------|--------|-----------------|--------|----------|---------|------|------|------|
|       |        |        |        | Area            | Area%  | Height   | Height% |      |      |      |
| 1     | 12.394 | 12.300 | 12.480 | 73988236        | 93.38  | 41701803 | 96.41   | 1.77 | MI   |      |
| 2     | 13.988 | 13.915 | 14.165 | 5242049         | 6.62   | 1553710  | 3.59    | 3.37 | MI   |      |
|       |        |        |        | 79230285        | 100.00 | 43255513 | 100.00  |      |      |      |

S18: GC spectra of hydroformylated product of 4-methylstyrene in THF at 45 °C

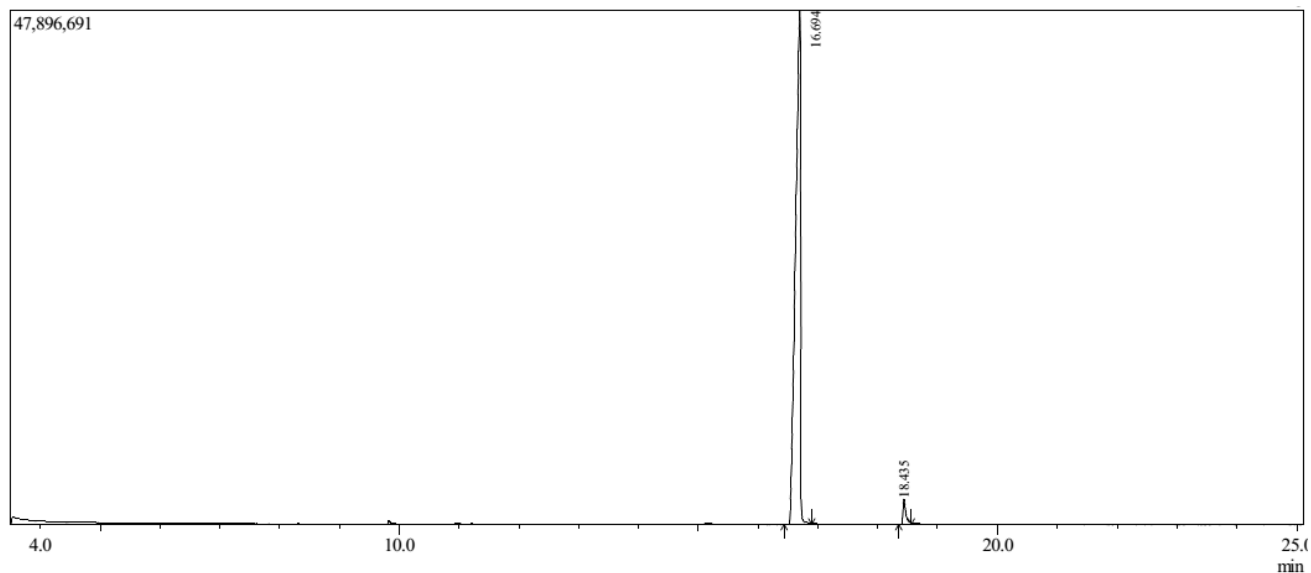

| Peak Report TIC |        |        |        |           |        |          |         |      |      |      |
|-----------------|--------|--------|--------|-----------|--------|----------|---------|------|------|------|
| Peak#           | R.Time | I.Time | F.Time | Area      | Area%  | Height   | Height% | A/H  | Mark | Name |
| 1               | 16.694 | 16.435 | 16.895 | 272905195 | 97.25  | 47834968 | 95.34   | 5.71 | MI   |      |
| 2               | 18.435 | 18.350 | 18.555 | 7719051   | 2.75   | 2340047  | 4.66    | 3.30 | MI   |      |
|                 |        |        |        | 280624246 | 100.00 | 50175015 | 100.00  |      |      |      |

S19: GC spectra of hydroformylated product of 4-vinylanisole in DCM at 45 °C

Line#:1 R.Time:16.635(Scan#:2628)  
MassPeaks:566  
RawMode:Single 16.635(2628) BasePeak:135(4936366)  
BG Mode:None Group 1 - Event 1

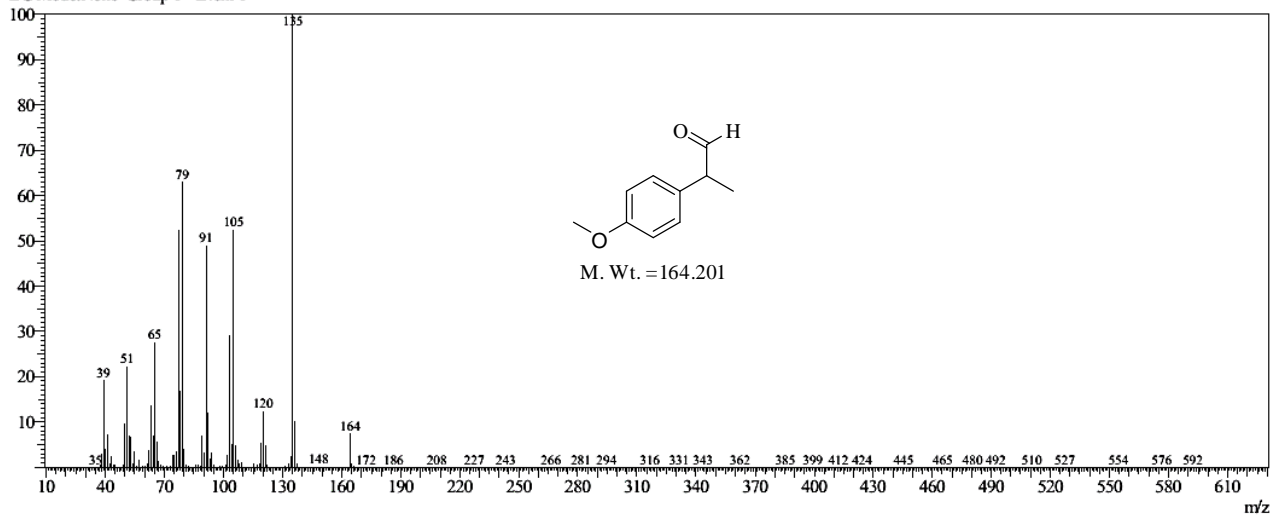

S20: Mass spectra of hydroformylated branched product of 4-vinylanisole

Line#:2 R.Time:18.450(Scan#:2991)  
MassPeaks:561  
RawMode:Single 18.450(2991) BasePeak:77(236529)  
BG Mode:None Group 1 - Event 1

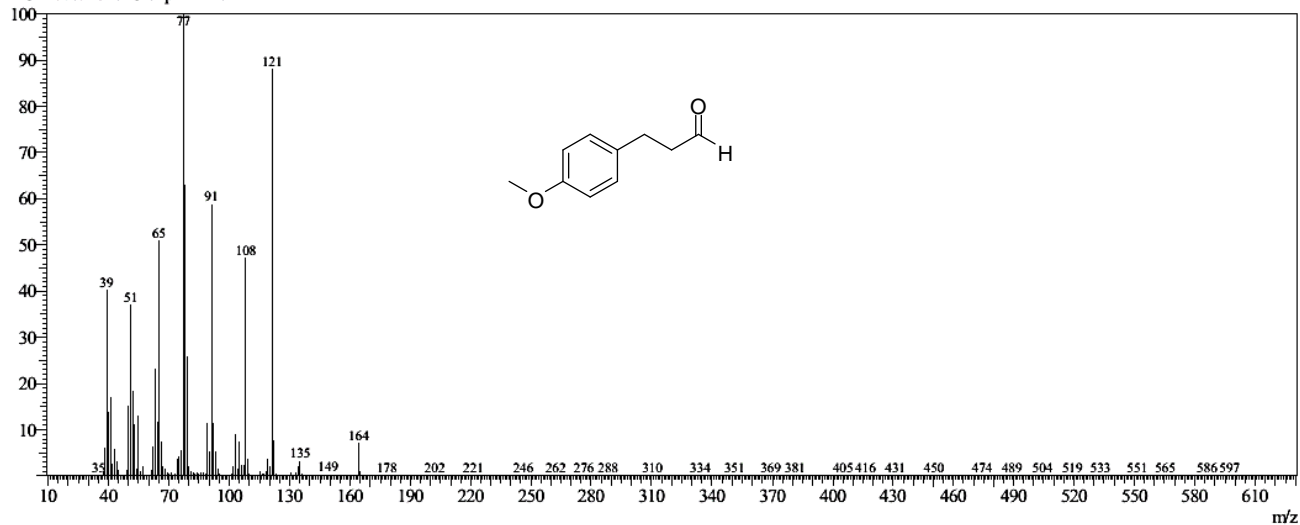

S21: Mass spectra of hydroformylated linear product of 4-vinylanisole

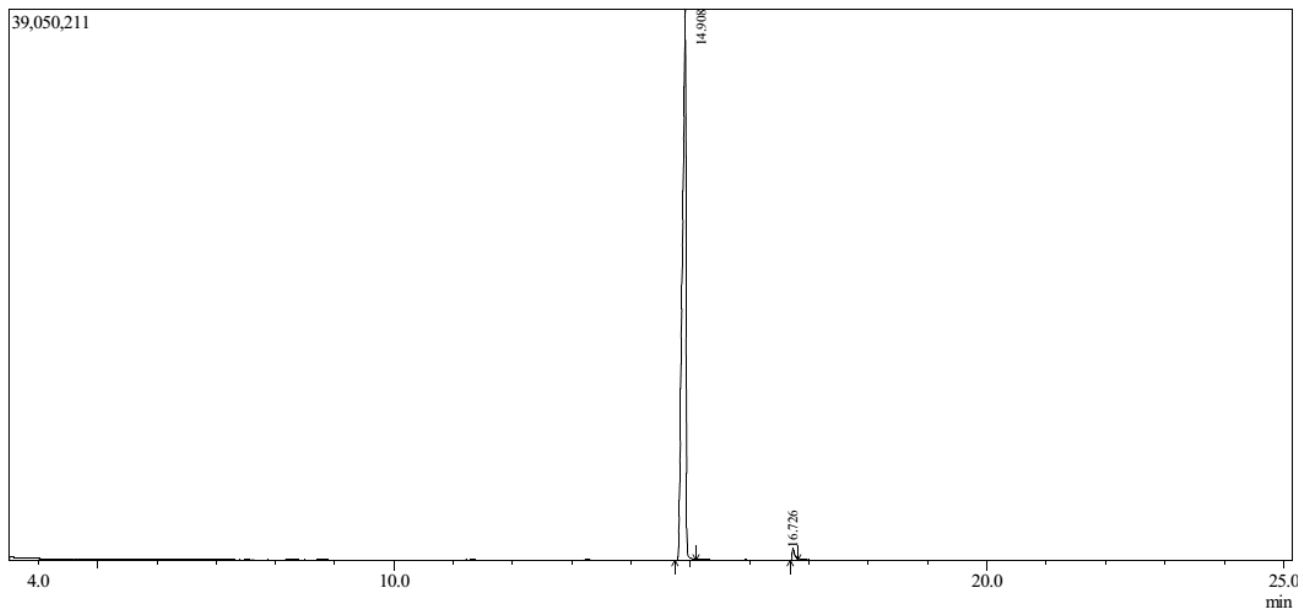

| Peak# | R.Time | I.Time | F.Time | Peak Report TIC |        |          |         | A/H  | Mark | Name |
|-------|--------|--------|--------|-----------------|--------|----------|---------|------|------|------|
|       |        |        |        | Area            | Area%  | Height   | Height% |      |      |      |
| 1     | 14.908 | 14.735 | 15.095 | 163683712       | 98.59  | 38978682 | 97.97   | 4.20 | MI   |      |
| 2     | 16.726 | 16.685 | 16.805 | 2343331         | 1.41   | 807998   | 2.03    | 2.90 | MI   |      |
|       |        |        |        | 166027043       | 100.00 | 39786680 | 100.00  |      |      |      |

S22: GC spectra of hydroformylated product of 4-chlorostyrene in DCM at 45 °C

Line#:1 R.Time:14.875(Scan#:2276)  
MassPeaks:566  
RawMode:Single 14.875(2276) BasePeak:103(5180978)  
BG Mode:None Group 1 - Event 1

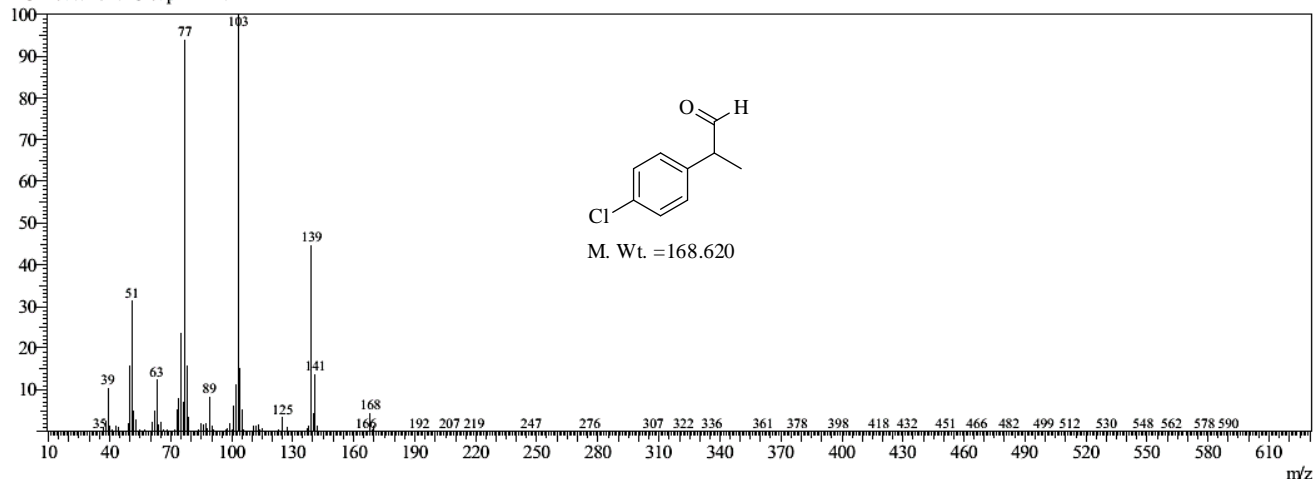

S23: Mass spectra of hydroformylated branched product of 4-chlorostyrene

Line#:2 R.Time:16.755(Scan#:2652)  
MassPeaks:564  
RawMode:Single 16.755(2652) BasePeak:77(53304)  
BG Mode:None Group 1 - Event 1

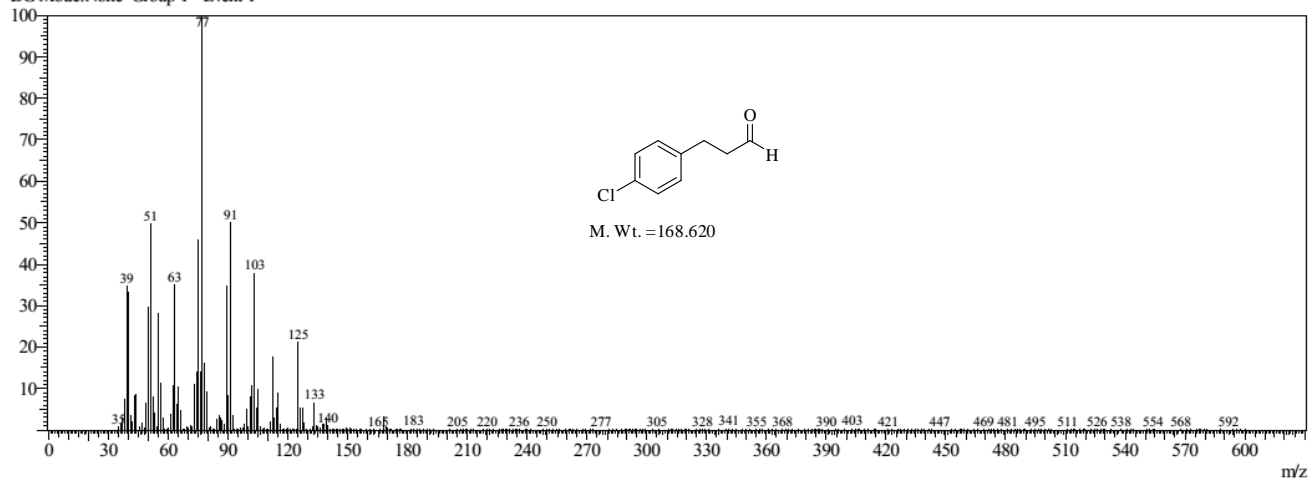

S24: Mass spectra of hydroformylated linear product of 4-chlorostyrene

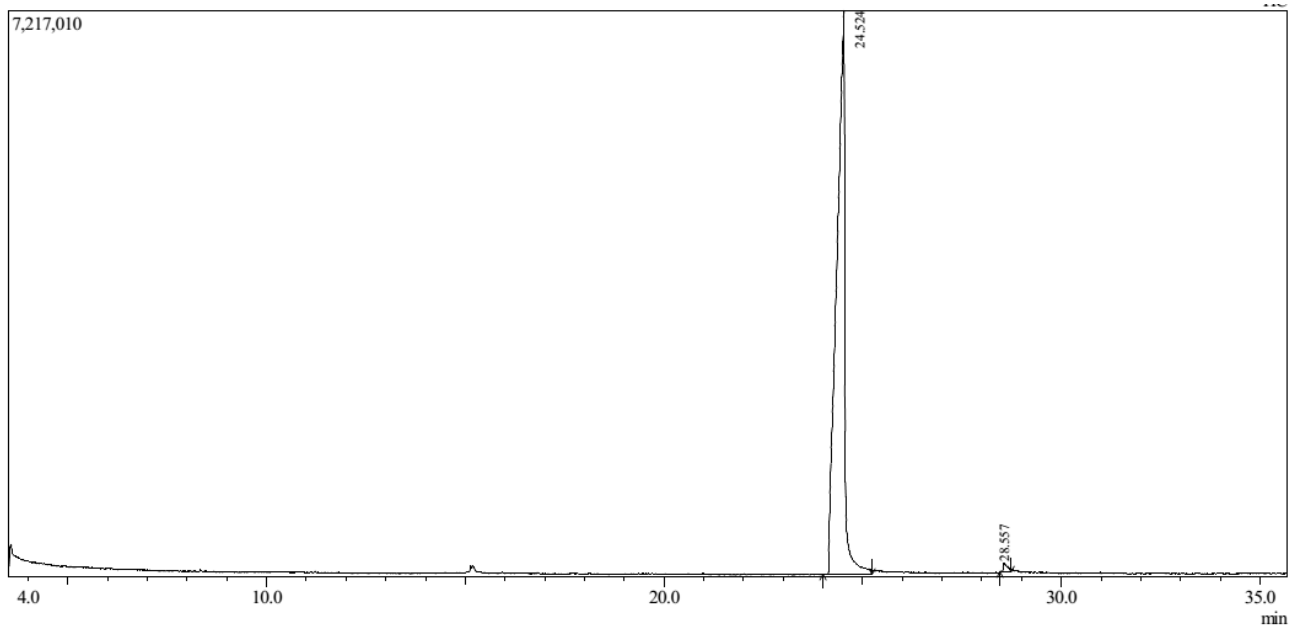

| Peak# | R.Time | I.Time | F.Time | Peak Report TIC |        |         |         | A/H   | Mark | Name |
|-------|--------|--------|--------|-----------------|--------|---------|---------|-------|------|------|
|       |        |        |        | Area            | Area%  | Height  | Height% |       |      |      |
| 1     | 24.524 | 24.005 | 25.230 | 103093923       | 99.23  | 7172205 | 98.44   | 14.37 | MI   |      |
| 2     | 28.557 | 28.460 | 28.740 | 804413          | 0.77   | 113857  | 1.56    | 7.07  | MI   |      |
|       |        |        |        | 103898336       | 100.00 | 7286062 | 100.00  |       |      |      |

S25: GC spectra of hydroformylated product of 3-nitrostyrene in DCM at 45 °C

Line#:1 R.Time:24.410(Scan#:4183)  
MassPeaks:555  
RawMode:Single 24.410(4183) BasePeak:77(763040)  
BG Mode:None Group 1 - Event 1

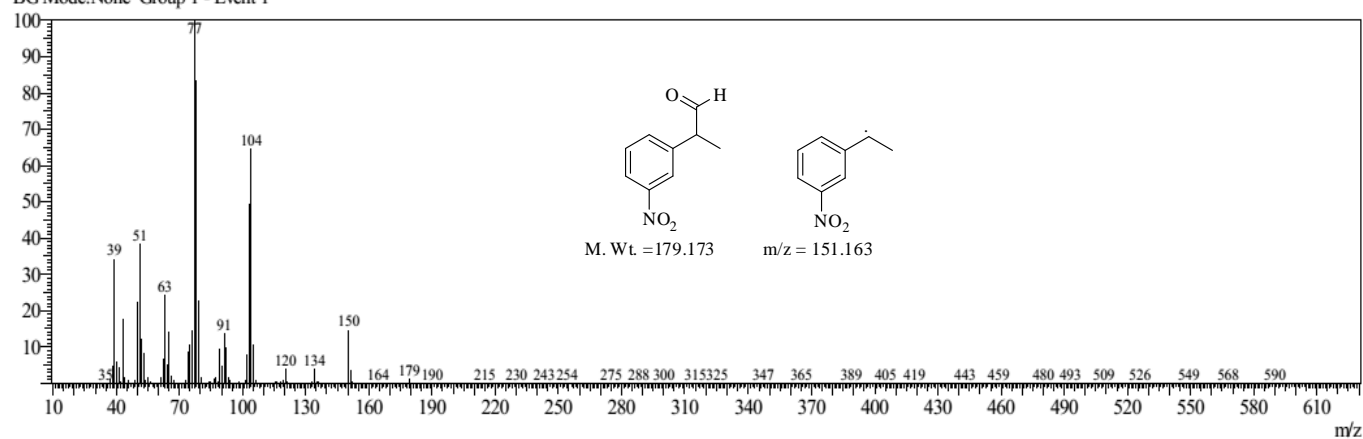

S26: Mass spectra of hydroformylated branched product of 3-nitrostyrene

Line#:2 R.Time:28.595(Scan#:5020)  
MassPeaks:550  
RawMode:Single 28.595(5020) BasePeak:77(18414)  
BG Mode:None Group 1 - Event 1

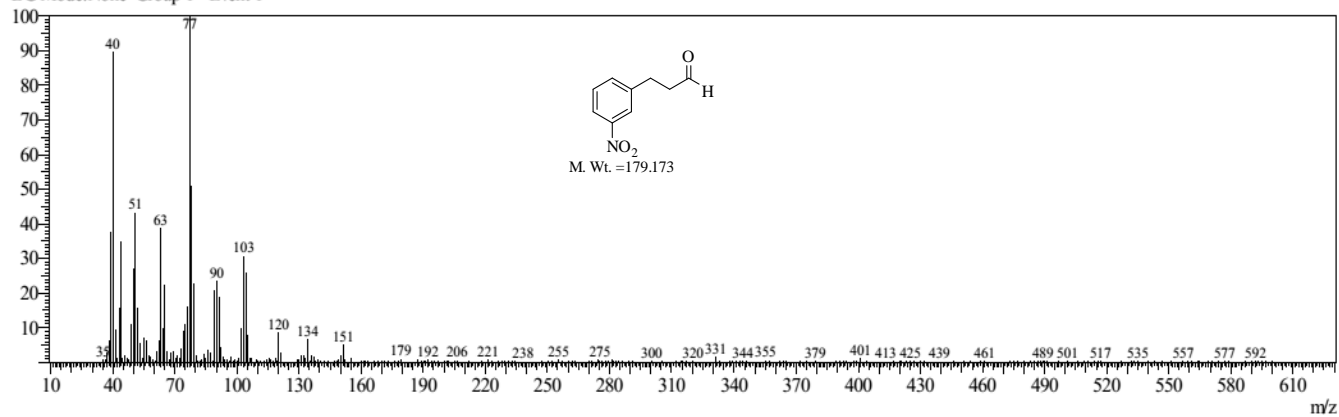

S27: Mass spectra of hydroformylated linear product of 3-nitrostyrene



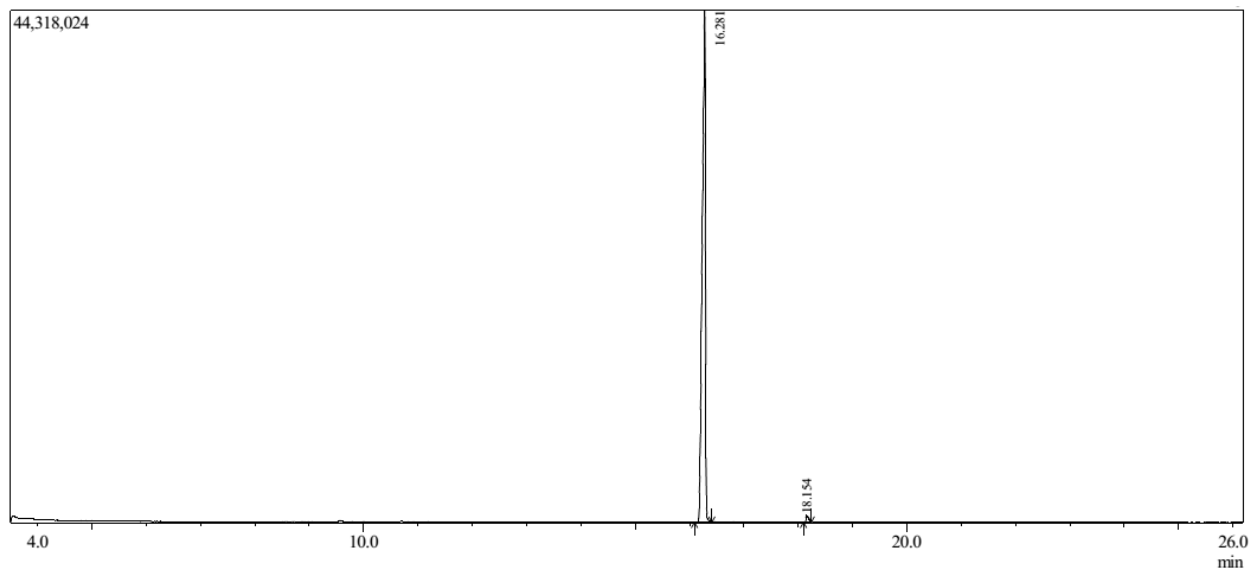

Peak Report TIC

| Peak# | R.Time | L.Time | F.Time | Area      | Area%  | Height   | Height% | A/H  | Mark | Name |
|-------|--------|--------|--------|-----------|--------|----------|---------|------|------|------|
| 1     | 16.281 | 16.090 | 16.410 | 178343429 | 98.91  | 44257404 | 98.65   | 4.03 | MI   |      |
| 2     | 18.154 | 18.095 | 18.240 | 1972289   | 1.09   | 607337   | 1.35    | 3.25 | MI   |      |
|       |        |        |        | 180315718 | 100.00 | 44864741 | 100.00  |      |      |      |

S28: GC spectra of hydroformylated product of 2-bromostyrene in DCM at 45 °C

Line#:1 R.Time:16.255(Scan#:2552)  
MassPeaks:558  
RawMode:Single 16.255(2552) BasePeak:77(5925094)  
BG Mode:None Group 1 - Event 1

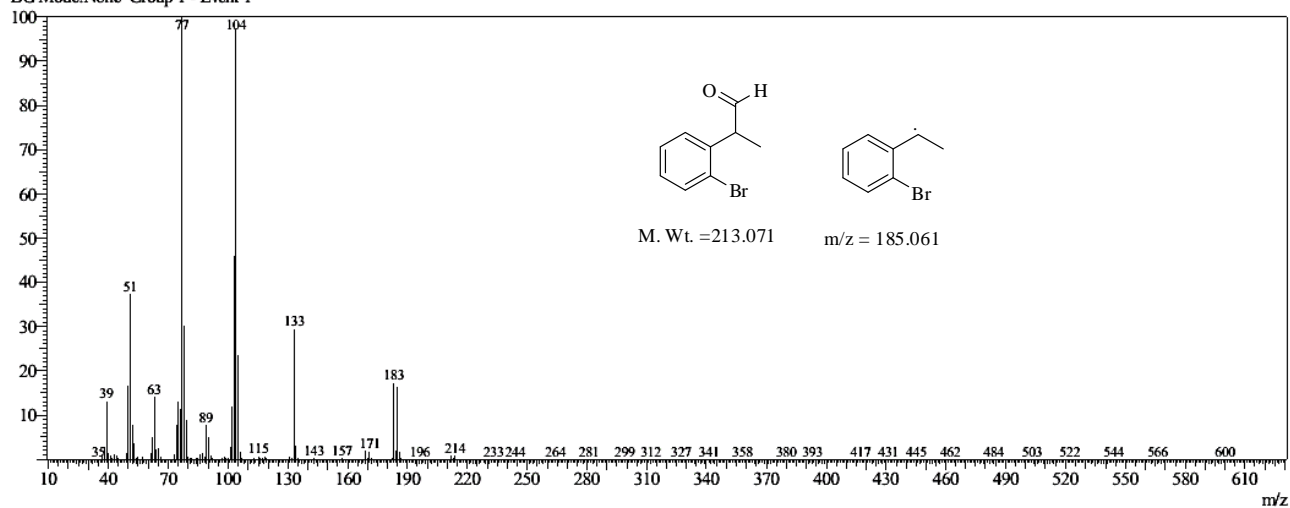

S29: Mass spectra of hydroformylated branched product of 2-bromostyrene

Line#:2 R.Time:18.190(Scan#:2939)  
MassPeaks:562  
RawMode:Single 18.190(2939) BasePeak:77(48836)  
BG Mode:None Group 1 - Event 1

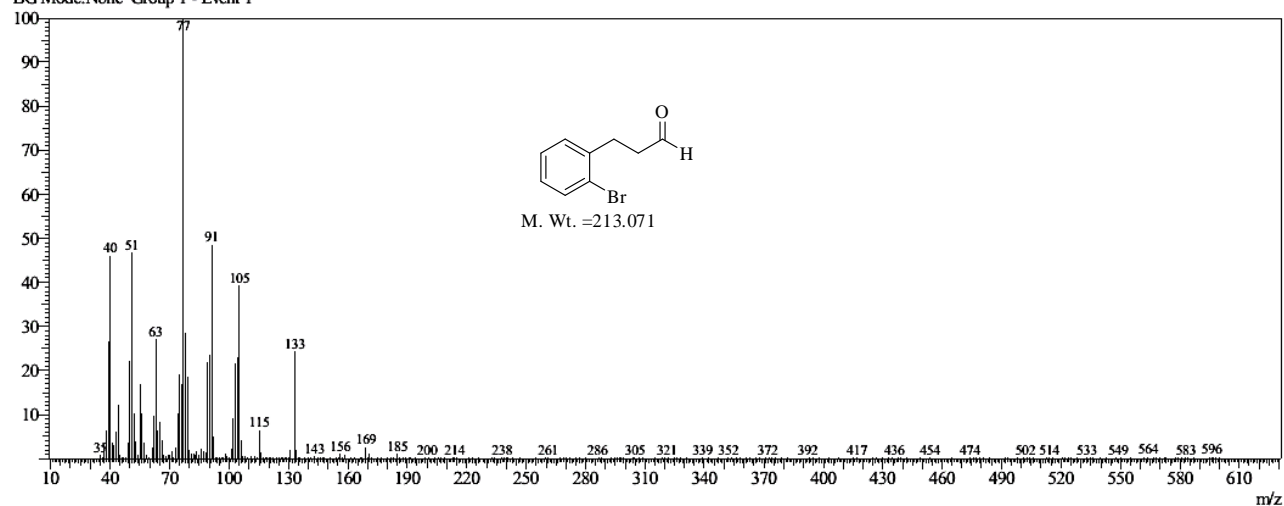

S30: Mass spectra of hydroformylated linear product of 2-bromostyrene

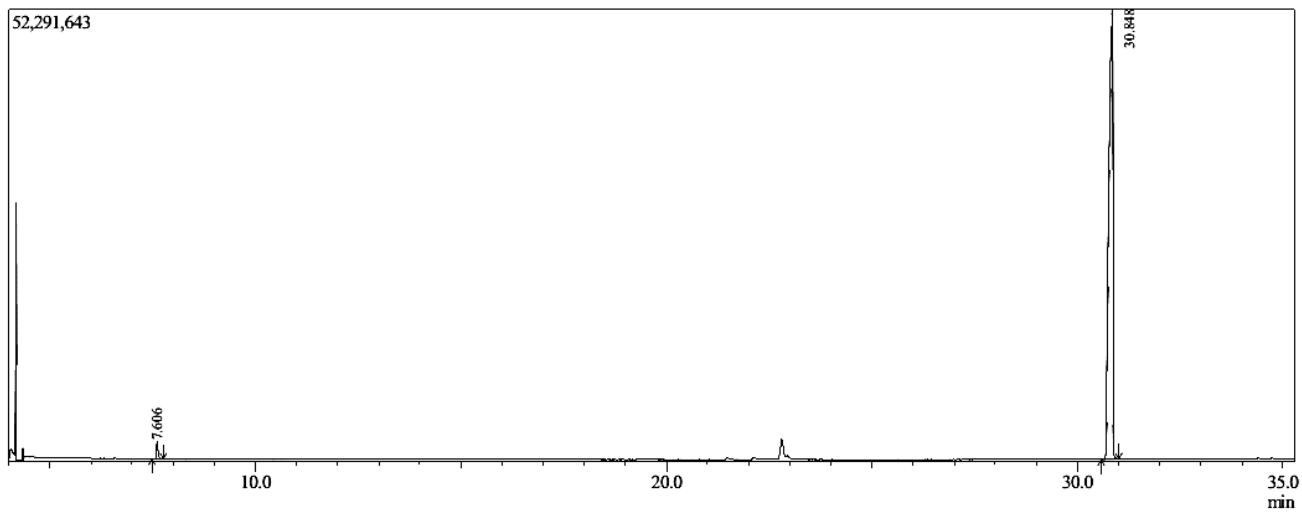

S31: GC spectra of Mizoroki-Heck reaction product of styrene and iodobenzene at 95°C

Line#:2 R.Time:7.585(Scan#:718)  
MassPeaks:546  
RawMode:Single 7.585(718) BasePeak:77(92893)  
BG Mode:None Group 1 - Event 1

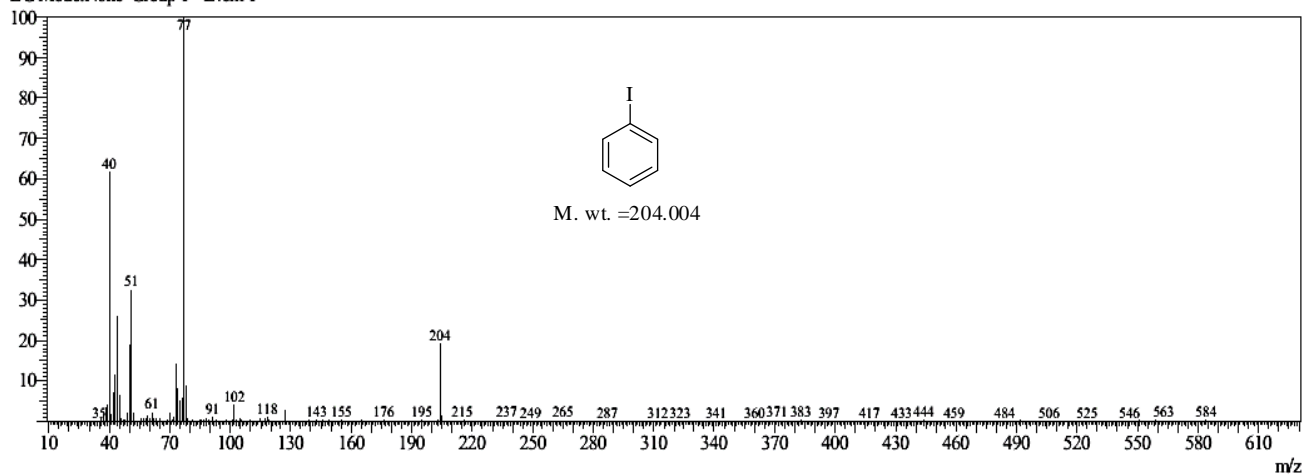

S32: Mass spectra of iodobenzene at  $R_t = 7.585$ .

Line#:3 R.Time:30.825(Scan#:5366)  
MassPeaks:520  
RawMode:Single 30.825(5366) BasePeak:180(7433609)  
BG Mode:None Group 1 - Event 1

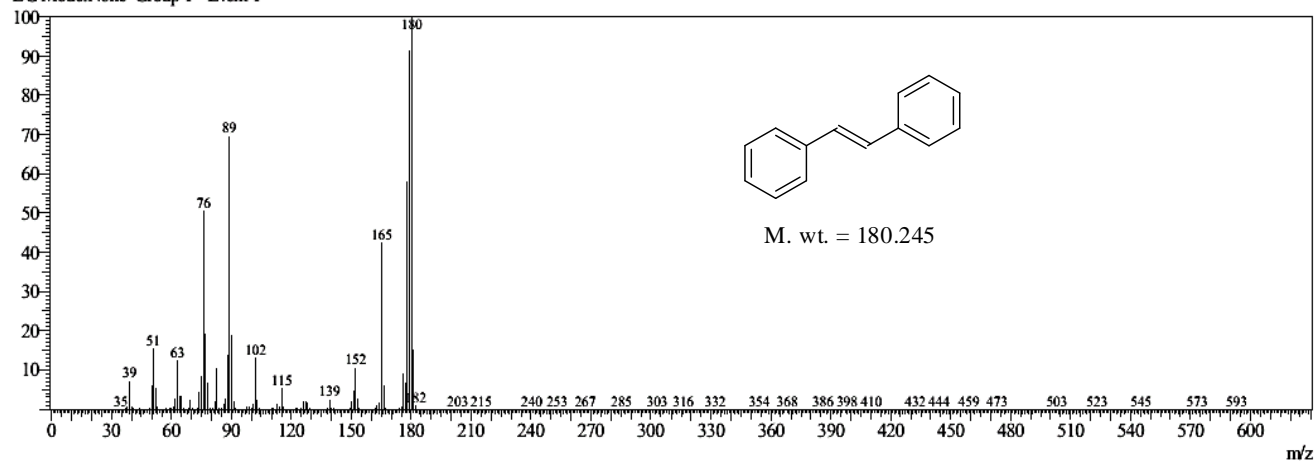

S33: Mass spectra of coupling reaction product of styrene and iodobenzene

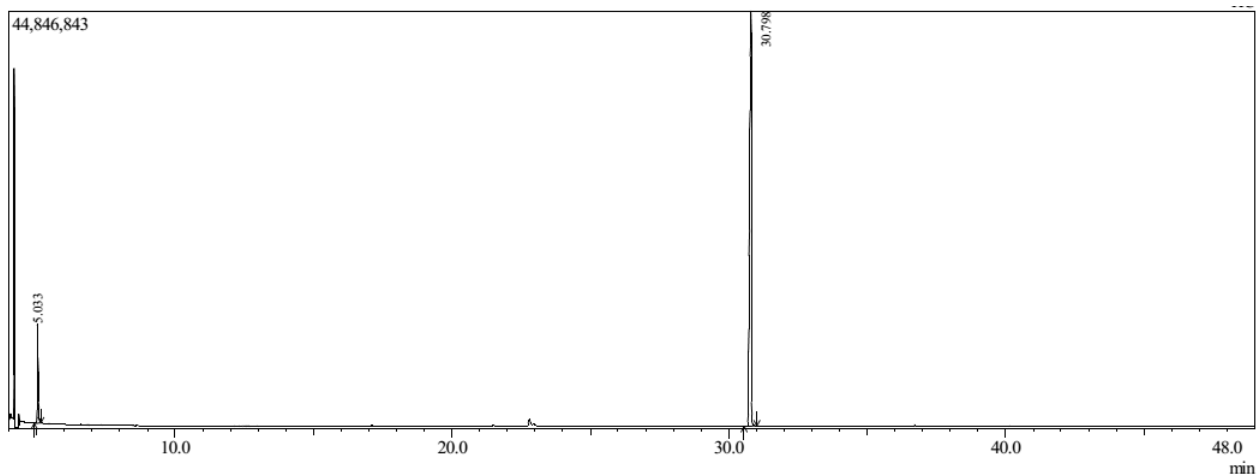

S34: GC spectra of Mizoroki-Heck reaction product of styrene and bromobenzene at 95°C after 1 hour

Line#:2 R.Time:5.055(Scan#:212)  
 MassPeaks:561  
 RawMode:Single 5.055(212) BasePeak:77(2522236)  
 BG Mode:None Group 1 - Event 1

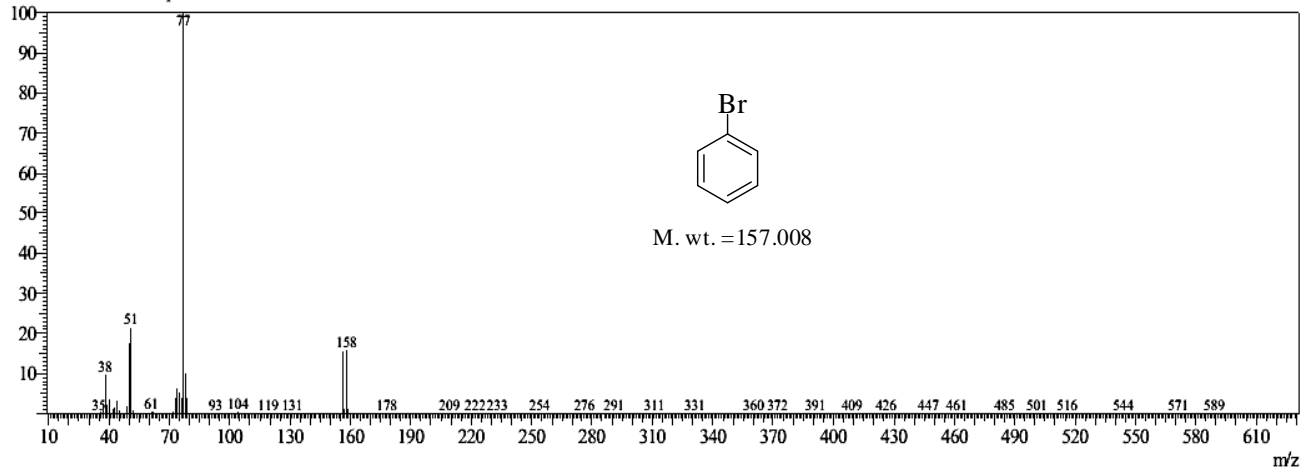

S35: Mass spectra of bromobenzene at  $R_t = 5.055$ .

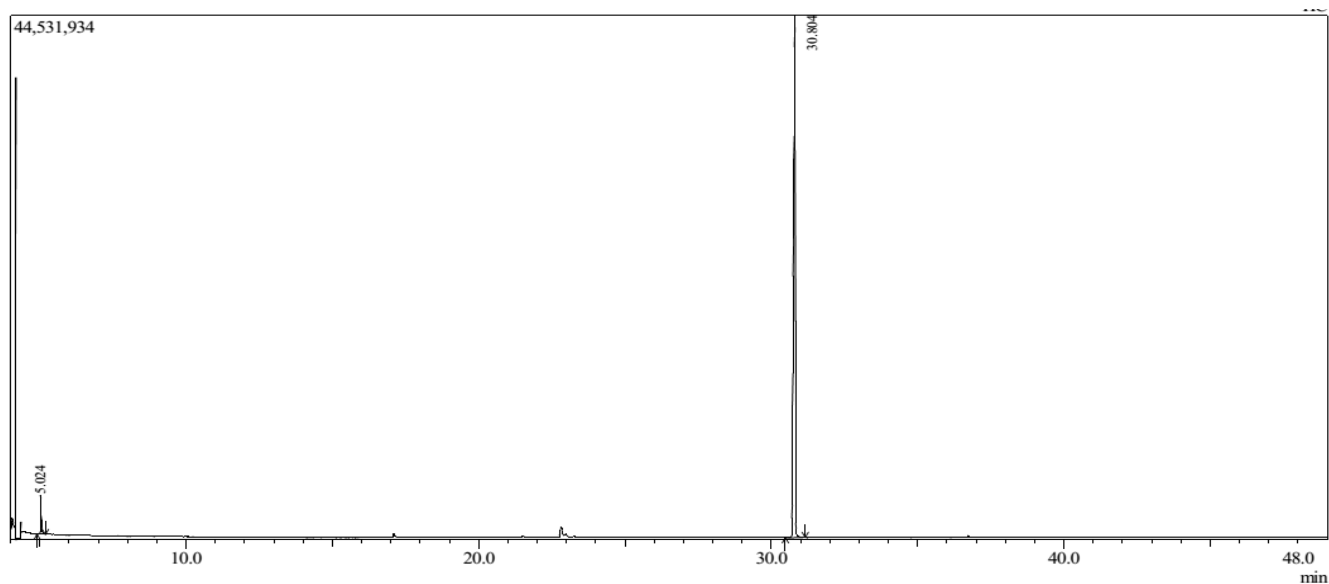

S36: GC spectra of Mizoroki-Heck reaction product of styrene and bromobenzene at 95°C after 2 hour

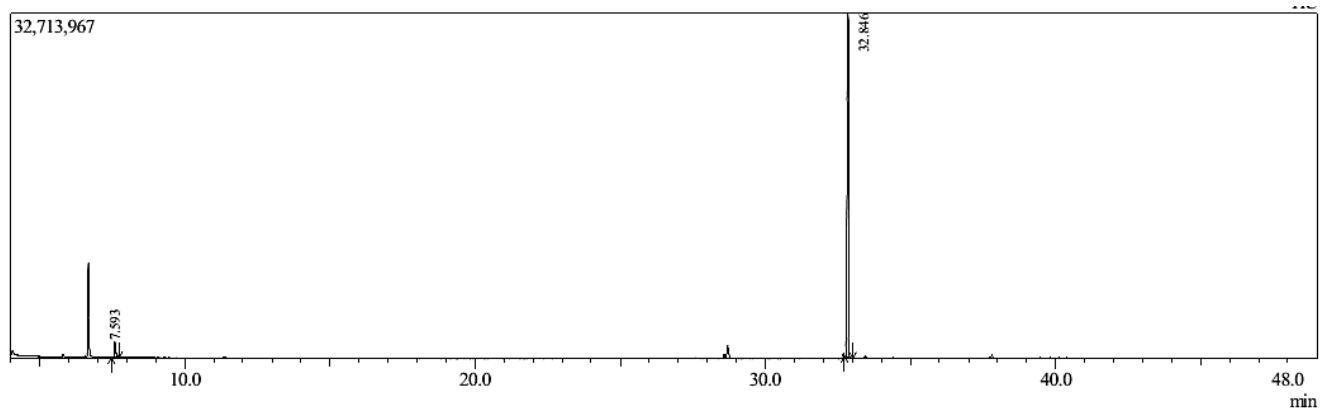

S37: GC spectra of Mizoroki-Heck reaction product of 4-methylstyrene and iodobenzene at 95°C

Line#:3 R.Time:32.870(Scan#:5775)

MassPeaks:489

RawMode:Single 32.870(5775) BasePeak:179(182713)

BGMode:None Group 1 - Event 1

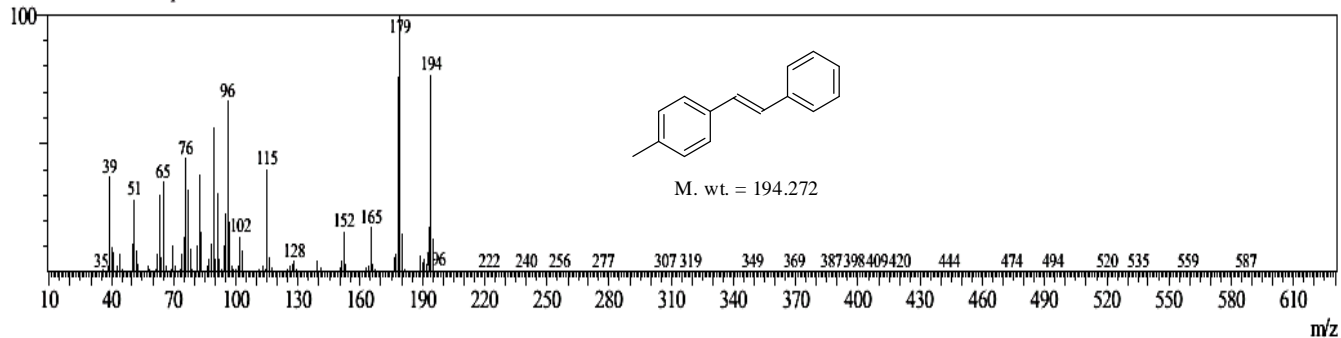

S38: Mass spectra of Mizoroki-Heck coupling reaction product of 4-methylstyrene

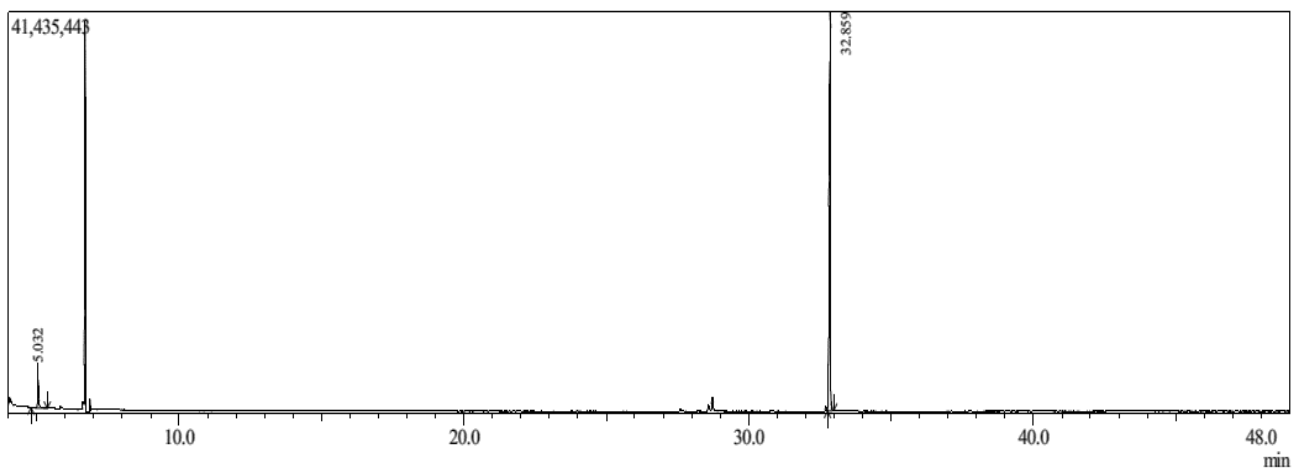

S39: GC spectra of Mizoroki-Heck reaction product of 4-methylstyrene and bromobenzene at 95°C after 30 minutes

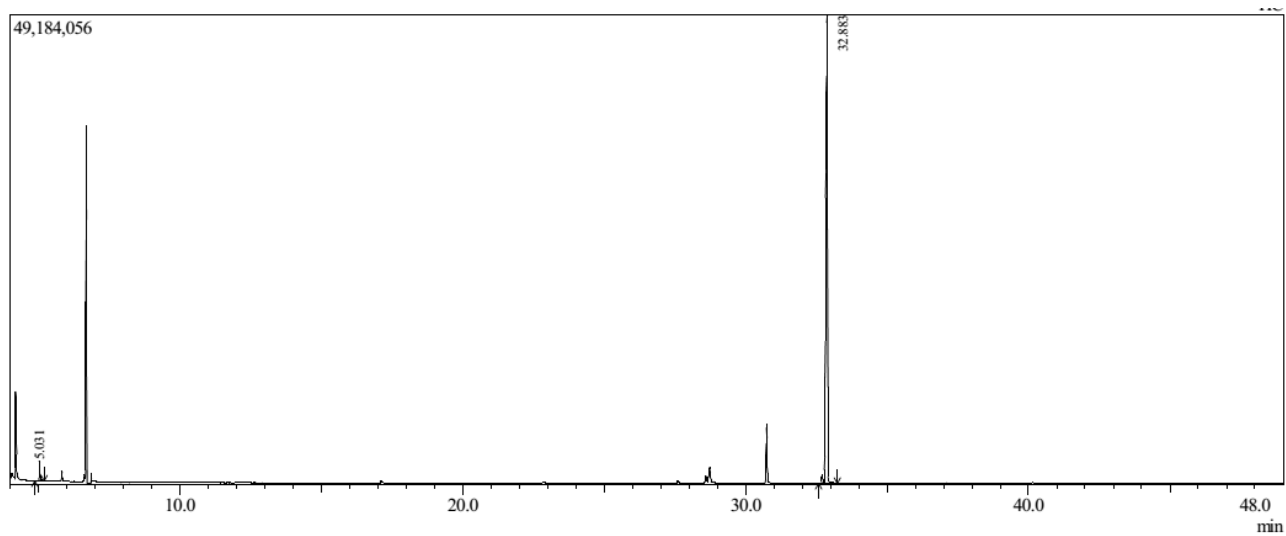

S40: GC spectra of Mizoroki-Heck reaction product of 4-methylstyrene and bromobenzene at 95°C after 2 hours

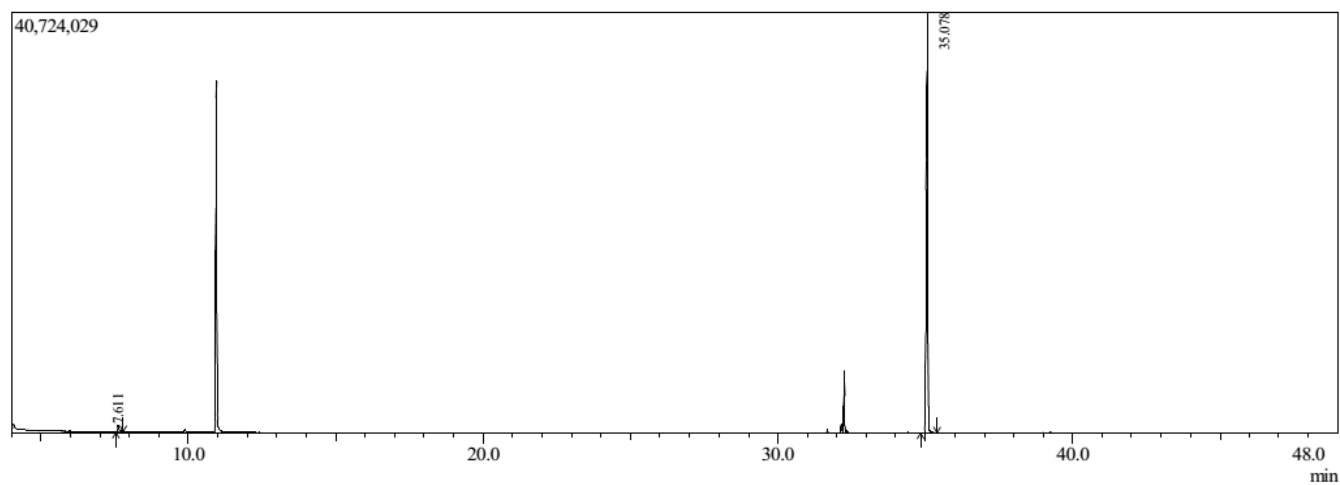

S41: GC spectra of Mizoroki-Heck reaction product of 4-vinylanisole and iodobenzene at 95°C after 30 minutes



Line#3 R.Time:35.050(Scan#:6211)

MassPeaks:482

RawMode:Single 35.050(6211) BasePeak:210(7036137)

BG Mode:None Group 1 - Event 1

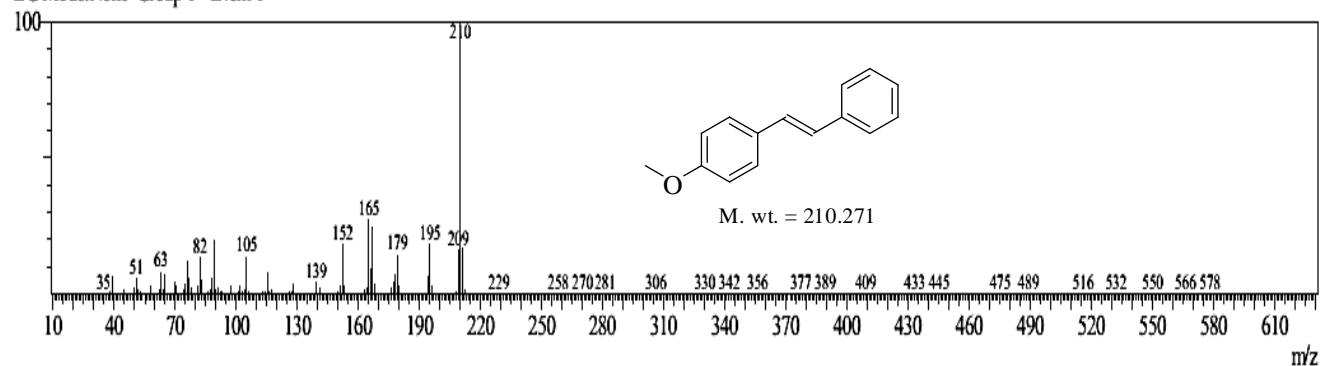

S42: Mass spectra of Mizoroki-Heck coupling reaction product of 4-vinylanisole

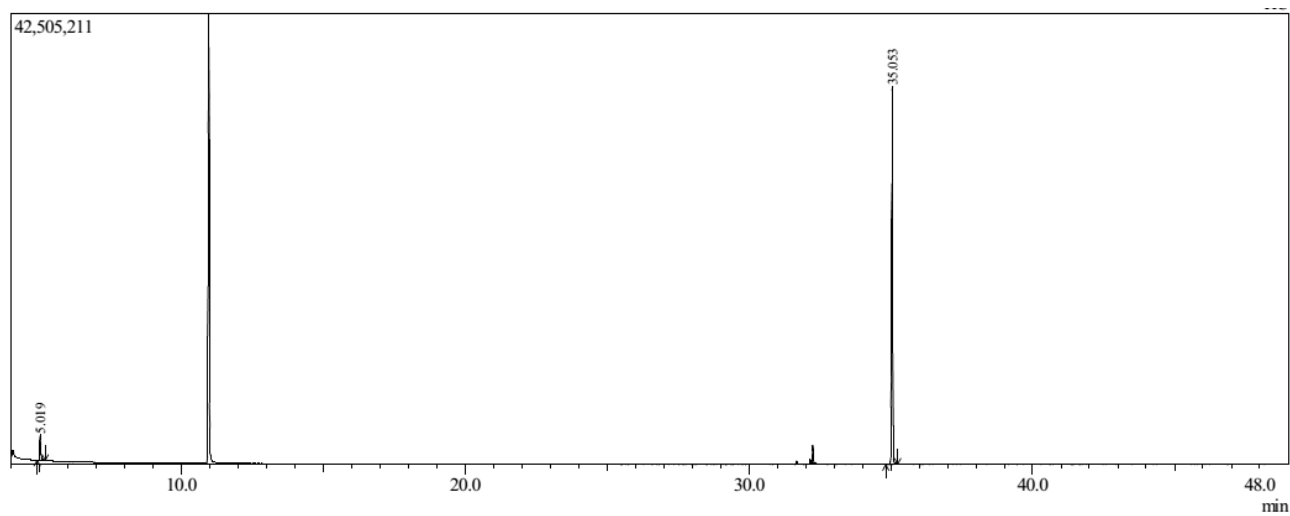

S43: GC spectra of Mizoroki-Heck reaction product of 4-vinylanisole and bromobenzene at 95°C after 1 hour

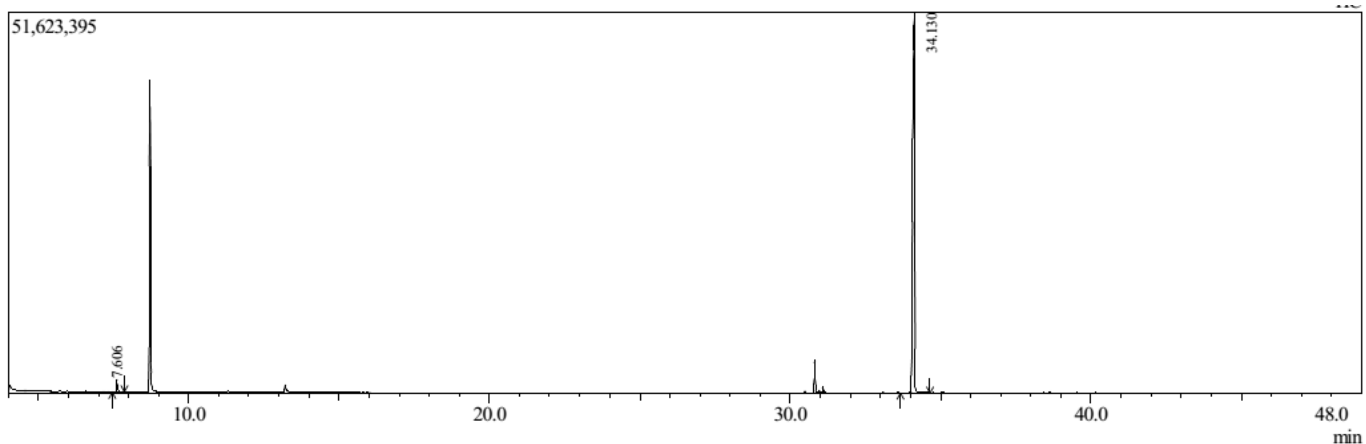

S44: GC spectra of Mizoroki-Heck reaction product of 4-chlorostyrene and iodobenzene at 95°C after 30 minutes

Line#:4 R.Time:34.105(Scan#:6022)

MassPeaks:496

RawMode:Single 34.105(6022) BasePeak:179(6070313)

BG Mode:None Group 1 - Event 1

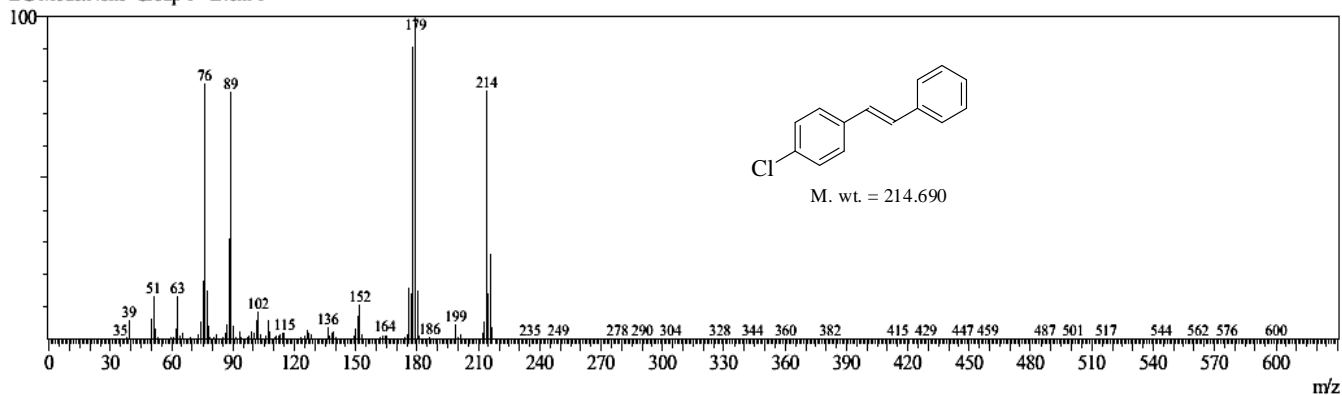

S45: Mass spectra of Mizoroki-Heck coupling reaction product of 4-chlorostyrene

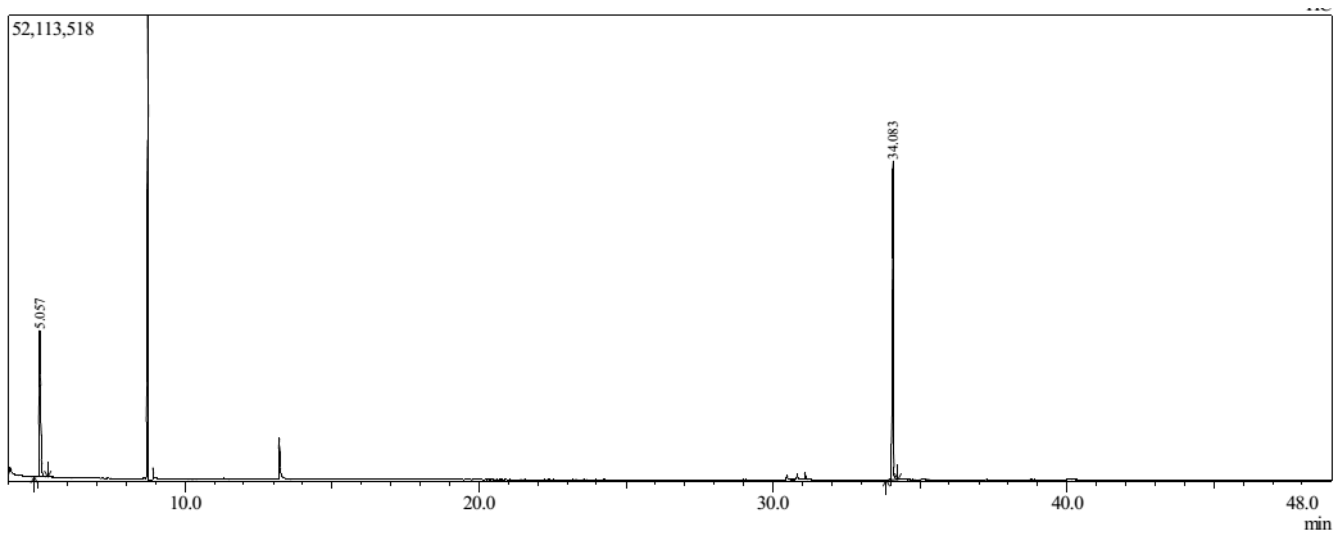

S46: GC spectra of Mizoroki-Heck reaction product of 4-chlorostyrene and bromobenzene at 95°C after 1 hour

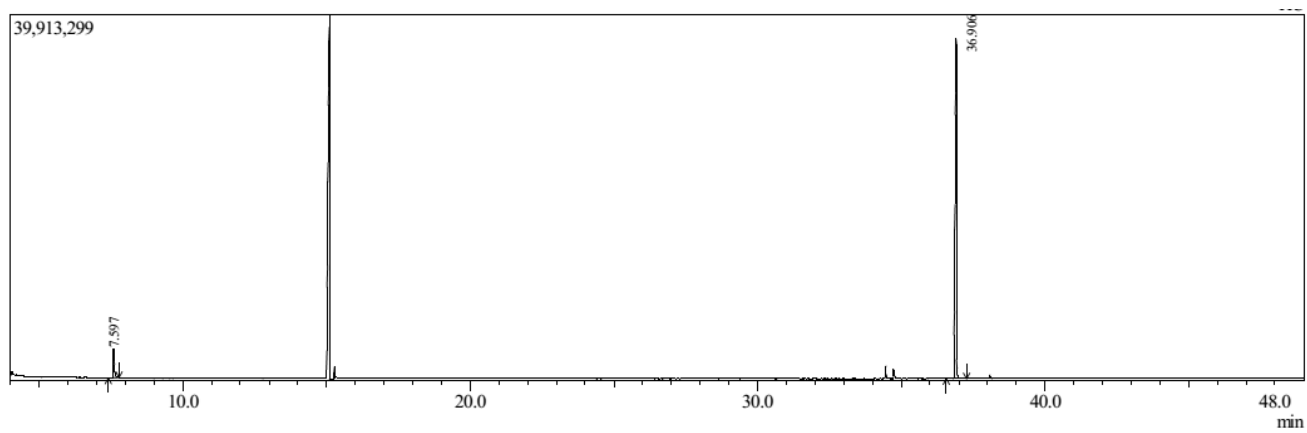

S47: GC spectra of Mizoroki-Heck reaction product of 3-nitrostyrene and iodobenzene at 95°C after 30 minutes

Line#:3 R.Time:36.900(Scan#:6581)  
MassPeaks:538  
RawMode:Single 36.900(6581) BasePeak:178(5630766)  
BG Mode:None Group 1 - Event 1

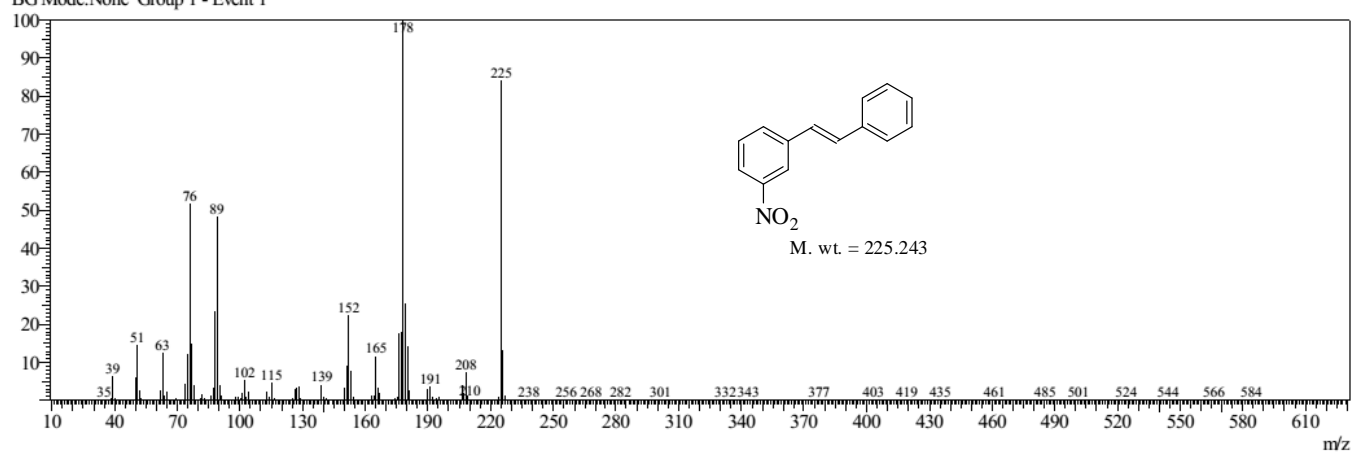

S48: Mass spectra of Mizoroki-Heck coupling reaction product of 3-nitrostyrene
